# Supplementary material for: Transcriptome and Proteome Analyses Reveal Stage-Specific DNA Damage Response in Embryos of Sturgeon (Acipenser ruthenus)
Source: MDPI journal article supplement (doi:10.3390/ijms23126392), 2022-06-07
Supplement: s1 [file s1]

**Supplementary Table S4.** Sterlet embryo viability and hatching rate following exposure to different concentrations of olaparib (5, 10, 20  $\mu$ M). Embryos were exposed to olaparib from 2 till 24 hours post-fertilization. All results are presented at 8 days post-fertilization. Results represent mean of two independent experiments, number of embryos N = 100.

| Treatment           | Live, % | Hatched, % |
|---------------------|---------|------------|
| Control             | 91      | 76         |
| Olaparib 5 $\mu$ M  | 96      | 62         |
| Olaparib 10 $\mu$ M | 92      | 56         |
| Olaparib 20 $\mu$ M | 40      | 7          |
