# Supplementary material for: Transcriptome and Proteome Analyses Reveal Stage-Specific DNA Damage Response in Embryos of Sturgeon (Acipenser ruthenus)
Source: Int J Mol Sci. 2022 Jun 7;23(12):6392. doi: 10.3390/ijms23126392 (PMC9223696; doi:10.3390/ijms23126392)
Supplement: Supplementary file 1 [file ijms-23-06392-s001.zip]

Archive with 5 entries (5 files):
- supplement_Table S1.xlsx
- Supplementary figures - 12102021.pdf
- Supplementary Table S2.xlsx
- Supplementary Table S3.xlsx
- Supplementary Table S4.pdf
