# Supplementary material for: Transcriptome and Proteome Analyses Reveal Stage-Specific DNA Damage Response in Embryos of Sturgeon (Acipenser ruthenus)
Source: Int J Mol Sci. 2022 Jun 7;23(12):6392. doi: 10.3390/ijms23126392 (PMC9223696; doi:10.3390/ijms23126392)
Supplement: Supplementary file 1 [file ijms-23-06392-s001.zip › supplement_Table S1.xlsx]

## Sheet: down-regulated
	Gene ontology and KEGG pathway enrichment analysis for genes downregulated in CPT24-48, CPT48-72, Ola2-24, Ola48-72 samples repectively. The last column "cluster", represents the member terms belonging to each cluster identified using "simplify enrichment".
	term_id	p_values	significant	term_size	query_sizes	intersection_sizes	source	term_name	effective_domain_size	source_order	parents	cluster
1	KEGG:00000	c(1.9619759208534e-115, 5.48942997463062e-36, 3.89575731495257e-132, 3.35555401184289e-114)	c(TRUE, TRUE, TRUE, TRUE)	2787	c(1546, 492, 1753, 1485)	c(652, 212, 737, 633)	KEGG	KEGG root term	15065	1	character(0)
2	KEGG:01100	c(5.4854765580774e-51, 4.31376386206876e-15, 1.49855684250351e-64, 2.45021790929716e-73)	c(TRUE, TRUE, TRUE, TRUE)	750	c(1546, 492, 1753, 1485)	c(223, 72, 261, 251)	KEGG	Metabolic pathways	15065	181	KEGG:00000
3	KEGG:03010	c(1.14322768511622e-28, 6.30235246724194e-19, 7.66669983396067e-21, 1.51774125000804e-43)	c(TRUE, TRUE, TRUE, TRUE)	88	c(1546, 492, 1753, 1485)	c(53, 28, 48, 64)	KEGG	Ribosome	15065	206	KEGG:00000
4	KEGG:00190	c(1.22663437773297e-07, 2.95037283681414e-06, 3.19124365569667e-19, 3.1558735725216e-24)	c(TRUE, TRUE, TRUE, TRUE)	61	c(1546, 492, 1753, 1485)	c(24, 13, 38, 40)	KEGG	Oxidative phosphorylation	15065	19	KEGG:00000
5	GO:1901566	c(1.4672853011551e-12, 0.0100167992216733, 0.000368863000019108, 9.6790751084591e-20)	c(TRUE, TRUE, TRUE, TRUE)	726	c(1546, 492, 1753, 1485)	c(149, 51, 136, 162)	GO:BP	organonitrogen compound biosynthetic process	15065	24826	c("GO:1901564", "GO:1901576")	3
6	KEGG:01200	c(0.0175541551466515, 0.404110022915565, 3.01164385103233e-09, 8.43846662069216e-13)	c(TRUE, FALSE, TRUE, TRUE)	55	c(1546, 492, 1753, 1485)	c(15, 6, 26, 28)	KEGG	Carbon metabolism	15065	184	KEGG:00000
7	KEGG:05132	c(3.06478490182694e-06, 0.0331150558222522, 1.65392981302883e-09, 3.65103671577431e-05)	c(TRUE, TRUE, TRUE, TRUE)	141	c(1546, 492, 1753, 1485)	c(37, 13, 46, 34)	KEGG	Salmonella infection	15065	407	KEGG:00000
8	GO:0051179	c(0.000322091339528871, 1, 2.17426570329412e-09, 1)	c(TRUE, FALSE, TRUE, FALSE)	1945	c(1546, 492, 1753, 1485)	c(274, 72, 330, 242)	GO:BP	localization	15065	15694	GO:0008150	5
9	KEGG:01240	c(5.03268461873928e-09, 1, 1.09780882871833e-07, 5.55367862231658e-08)	c(TRUE, FALSE, TRUE, TRUE)	80	c(1546, 492, 1753, 1485)	c(30, 6, 30, 28)	KEGG	Biosynthesis of cofactors	15065	189	KEGG:00000
10	KEGG:04810	c(4.51876197005303e-06, 0.299571463155112, 6.25251475284962e-09, 0.0565213430804298)	c(TRUE, FALSE, TRUE, FALSE)	103	c(1546, 492, 1753, 1485)	c(30, 9, 37, 21)	KEGG	Regulation of actin cytoskeleton	15065	345	KEGG:00000
11	KEGG:04510	c(0.00845619308743854, 0.0313583839708073, 1.61836288081084e-08, 0.00162356754962266)	c(TRUE, TRUE, TRUE, TRUE)	106	c(1546, 492, 1753, 1485)	c(24, 11, 37, 25)	KEGG	Focal adhesion	15065	293	KEGG:00000
12	GO:0044281	c(6.53561388720803e-05, 1, 0.000264942206714355, 2.36447615796973e-08)	c(TRUE, FALSE, TRUE, TRUE)	635	c(1546, 492, 1753, 1485)	c(114, 35, 123, 121)	GO:BP	small molecule metabolic process	15065	12753	GO:0008152	1
13	KEGG:04142	c(3.43763451060604e-07, 0.259342105968716, 6.64341482607211e-08, 5.12338284182142e-05)	c(TRUE, FALSE, TRUE, TRUE)	83	c(1546, 492, 1753, 1485)	c(28, 8, 31, 24)	KEGG	Lysosome	15065	260	KEGG:00000
14	GO:0065008	c(8.83560635385004e-08, 0.00340443691674527, 5.39118265652327e-06, 0.0182438504932966)	c(TRUE, TRUE, TRUE, TRUE)	722	c(1546, 492, 1753, 1485)	c(135, 52, 142, 113)	GO:BP	regulation of biological quality	15065	18664	GO:0065007	6
15	KEGG:00520	c(0.00436099439266299, 0.103616698405821, 9.22531321497962e-08, 9.02071250491034e-07)	c(TRUE, FALSE, TRUE, TRUE)	29	c(1546, 492, 1753, 1485)	c(11, 5, 17, 15)	KEGG	Amino sugar and nucleotide sugar metabolism	15065	73	KEGG:00000
16	GO:0006810	c(0.00820723420631569, 1, 1.36756930765404e-07, 0.881110792757492)	c(TRUE, FALSE, TRUE, FALSE)	1560	c(1546, 492, 1753, 1485)	c(221, 59, 269, 202)	GO:BP	transport	15065	2779	GO:0051234	5
17	GO:0055114	c(0.100525338955452, 1, 2.17060975493985e-07, 8.23109620464092e-05)	c(FALSE, FALSE, TRUE, TRUE)	382	c(1546, 492, 1753, 1485)	c(69, 23, 92, 76)	GO:BP	obsolete oxidation-reduction process	15065	16857	character(0)
18	KEGG:00980	c(5.60744551883592e-06, 0.115152811777857, 2.21498461347841e-07, 0.00345194713700319)	c(TRUE, FALSE, TRUE, TRUE)	9	c(1546, 492, 1753, 1485)	c(8, 3, 9, 6)	KEGG	Metabolism of xenobiotics by cytochrome P450	15065	154	KEGG:00000
19	GO:0043603	c(0.0529304251769021, 0.668299166315822, 1, 3.17224136293433e-07)	c(FALSE, FALSE, FALSE, TRUE)	471	c(1546, 492, 1753, 1485)	c(82, 34, 78, 95)	GO:BP	cellular amide metabolic process	15065	12472	GO:0034641	3
20	KEGG:00010	c(0.111611089786596, 1, 2.85675471811343e-05, 3.43554620900222e-07)	c(FALSE, FALSE, TRUE, TRUE)	24	c(1546, 492, 1753, 1485)	c(8, 3, 13, 14)	KEGG	Glycolysis / Gluconeogenesis	15065	2	KEGG:00000
21	KEGG:04260	c(0.154326955347316, 0.000971392192391209, 0.000188842462926775, 4.34197136105702e-07)	c(FALSE, TRUE, TRUE, TRUE)	48	c(1546, 492, 1753, 1485)	c(12, 9, 18, 20)	KEGG	Cardiac muscle contraction	15065	276	KEGG:00000
22	GO:0051234	c(0.0123503229776152, 1, 4.98193912213413e-07, 1)	c(TRUE, FALSE, TRUE, FALSE)	1585	c(1546, 492, 1753, 1485)	c(223, 59, 270, 203)	GO:BP	establishment of localization	15065	15738	GO:0051179	5
23	KEGG:04080	c(0.000105927915721027, 1, 5.64258303122361e-07, 0.00346591313374747)	c(TRUE, FALSE, TRUE, TRUE)	67	c(1546, 492, 1753, 1485)	c(21, 5, 26, 18)	KEGG	Neuroactive ligand-receptor interaction	15065	244	KEGG:00000
24	KEGG:00260	c(2.25574290208733e-06, 1, 1.16654991884197e-06, 1.4091163324446e-05)	c(TRUE, FALSE, TRUE, TRUE)	26	c(1546, 492, 1753, 1485)	c(14, 3, 15, 13)	KEGG	Glycine, serine and threonine metabolism	15065	29	KEGG:00000
25	GO:0043604	c(0.0506124639804032, 0.300536581572732, 1, 2.20157496069153e-06)	c(FALSE, FALSE, FALSE, TRUE)	375	c(1546, 492, 1753, 1485)	c(69, 30, 62, 79)	GO:BP	amide biosynthetic process	15065	12473	c("GO:0043603", "GO:0044271")	3
26	GO:0048646	c(0.064845991934109, 1, 2.79141543228227e-06, 0.850263638028957)	c(FALSE, FALSE, TRUE, FALSE)	299	c(1546, 492, 1753, 1485)	c(58, 24, 75, 53)	GO:BP	anatomical structure formation involved in morphogenesis	15065	14992	c("GO:0009653", "GO:0032502")	4
27	GO:0043043	c(0.196838001151156, 0.90099392509312, 1, 3.66482778065393e-06)	c(FALSE, FALSE, FALSE, TRUE)	338	c(1546, 492, 1753, 1485)	c(62, 27, 56, 73)	GO:BP	peptide biosynthetic process	15065	12141	c("GO:0006518", "GO:0043604", "GO:1901566")	3
28	KEGG:00590	c(4.25566227140713e-06, 0.164700389144035, 0.000182486008858615, 0.0218927003861698)	c(TRUE, FALSE, TRUE, TRUE)	20	c(1546, 492, 1753, 1485)	c(12, 4, 11, 8)	KEGG	Arachidonic acid metabolism	15065	94	KEGG:00000
29	GO:0006518	c(0.305497765615931, 1, 1, 4.46750063781221e-06)	c(FALSE, FALSE, FALSE, TRUE)	394	c(1546, 492, 1753, 1485)	c(69, 28, 63, 81)	GO:BP	peptide metabolic process	15065	2505	c("GO:0043603", "GO:1901564")	3
30	GO:0032501	c(0.000463608123623464, 1, 4.54473691605308e-06, 0.205268536054375)	c(TRUE, FALSE, TRUE, FALSE)	1749	c(1546, 492, 1753, 1485)	c(250, 85, 288, 227)	GO:BP	multicellular organismal process	15065	8831	GO:0008150	12
31	KEGG:01230	c(0.00180643497278475, 1, 4.53399596362118e-05, 4.64774339543427e-06)	c(TRUE, FALSE, TRUE, TRUE)	36	c(1546, 492, 1753, 1485)	c(13, 4, 16, 16)	KEGG	Biosynthesis of amino acids	15065	188	KEGG:00000
32	GO:0006412	c(0.271337012620527, 0.727962212615678, 1, 5.42382856294875e-06)	c(FALSE, FALSE, FALSE, TRUE)	334	c(1546, 492, 1753, 1485)	c(61, 27, 56, 72)	GO:BP	translation	15065	2415	c("GO:0010467", "GO:0034645", "GO:0043043", "GO:0044267")	3
33	GO:1901135	c(0.0264634350030217, 1, 0.338702561392479, 6.48087791375072e-06)	c(TRUE, FALSE, FALSE, TRUE)	383	c(1546, 492, 1753, 1485)	c(71, 20, 74, 79)	GO:BP	carbohydrate derivative metabolic process	15065	24428	GO:0071704	10
34	GO:0006091	c(1, 1, 0.0269897068887397, 6.85710887549065e-06)	c(FALSE, FALSE, TRUE, TRUE)	142	c(1546, 492, 1753, 1485)	c(19, 11, 38, 41)	GO:BP	generation of precursor metabolites and energy	15065	2131	GO:0044237	2
35	KEGG:04146	c(7.16446746640328e-06, 0.0448306083425503, 1.48253782792022e-05, 8.22020156754419e-05)	c(TRUE, TRUE, TRUE, TRUE)	63	c(1546, 492, 1753, 1485)	c(22, 8, 23, 20)	KEGG	Peroxisome	15065	263	KEGG:00000
36	KEGG:00630	c(0.000275716523730232, 1, 7.87134195524024e-06, 0.000198322568821235)	c(TRUE, FALSE, TRUE, TRUE)	19	c(1546, 492, 1753, 1485)	c(10, 3, 12, 10)	KEGG	Glyoxylate and dicarboxylate metabolism	15065	109	KEGG:00000
37	GO:0008150	c(0.00165506124307299, 1, 8.24911923805173e-06, 1)	c(TRUE, FALSE, TRUE, FALSE)	9781	c(1546, 492, 1753, 1485)	c(1099, 349, 1255, 1026)	GO:BP	biological_process	15065	3543	character(0)	13
38	GO:0022900	c(1, 1, 1, 1.14906857616327e-05)	c(FALSE, FALSE, FALSE, TRUE)	62	c(1546, 492, 1753, 1485)	c(10, 6, 19, 25)	GO:BP	electron transport chain	15065	7638	GO:0006091	2
39	KEGG:04530	c(1.17595951126694e-05, 0.188876111964786, 4.59278455252893e-05, 0.712787509872614)	c(TRUE, FALSE, TRUE, FALSE)	96	c(1546, 492, 1753, 1485)	c(28, 9, 29, 17)	KEGG	Tight junction	15065	297	KEGG:00000
40	KEGG:04060	c(0.0637168784166771, 1, 1.82285597274368e-05, 0.589933293327426)	c(FALSE, FALSE, TRUE, FALSE)	38	c(1546, 492, 1753, 1485)	c(11, 3, 17, 9)	KEGG	Cytokine-cytokine receptor interaction	15065	234	KEGG:00000
41	KEGG:00030	c(0.00955021289328117, 1, 0.00143578824578975, 1.93299357999823e-05)	c(TRUE, FALSE, TRUE, TRUE)	10	c(1546, 492, 1753, 1485)	c(6, 2, 7, 8)	KEGG	Pentose phosphate pathway	15065	4	KEGG:00000
42	KEGG:04141	c(2.58030333362488e-05, 1, 0.000339906754341026, 0.0039968121229037)	c(TRUE, FALSE, TRUE, TRUE)	105	c(1546, 492, 1753, 1485)	c(29, 7, 29, 24)	KEGG	Protein processing in endoplasmic reticulum	15065	259	KEGG:00000
43	KEGG:04144	c(0.00226497383484681, 1, 2.80533860222805e-05, 1)	c(TRUE, FALSE, TRUE, FALSE)	136	c(1546, 492, 1753, 1485)	c(30, 3, 37, 19)	KEGG	Endocytosis	15065	261	KEGG:00000
44	GO:0006082	c(0.0130363313143221, 1, 0.0953411441968256, 3.19231192694323e-05)	c(TRUE, FALSE, FALSE, TRUE)	306	c(1546, 492, 1753, 1485)	c(61, 19, 64, 66)	GO:BP	organic acid metabolic process	15065	2123	c("GO:0044237", "GO:0044281", "GO:0071704")	1
45	GO:0005975	c(1, 1, 3.87317054220202e-05, 0.0132320992309003)	c(FALSE, FALSE, TRUE, TRUE)	207	c(1546, 492, 1753, 1485)	c(41, 11, 56, 45)	GO:BP	carbohydrate metabolic process	15065	2018	c("GO:0044238", "GO:0071704")	7
46	GO:1901605	c(4.30041756493456e-05, 1, 1, 0.00930755421589706)	c(TRUE, FALSE, FALSE, TRUE)	77	c(1546, 492, 1753, 1485)	c(28, 8, 22, 24)	GO:BP	alpha-amino acid metabolic process	15065	24857	GO:0006520	1
47	KEGG:04140	c(0.00484139211929616, 1, 0.000101094728156525, 1)	c(TRUE, FALSE, TRUE, FALSE)	84	c(1546, 492, 1753, 1485)	c(21, 4, 26, 10)	KEGG	Autophagy - animal	15065	258	KEGG:00000
48	KEGG:00051	c(0.0331924378477455, 1, 0.000105599577843998, 0.0269111009989235)	c(TRUE, FALSE, TRUE, TRUE)	16	c(1546, 492, 1753, 1485)	c(7, 1, 10, 7)	KEGG	Fructose and mannose metabolism	15065	6	KEGG:00000
49	GO:1901137	c(0.551744831764271, 1, 1, 0.000118257129960557)	c(FALSE, FALSE, FALSE, TRUE)	255	c(1546, 492, 1753, 1485)	c(49, 11, 47, 57)	GO:BP	carbohydrate derivative biosynthetic process	15065	24430	c("GO:1901135", "GO:1901576")	3
50	KEGG:04020	c(0.234435909270498, 1, 0.000126625924241955, 0.0232966693955536)	c(FALSE, FALSE, TRUE, TRUE)	90	c(1546, 492, 1753, 1485)	c(18, 5, 27, 20)	KEGG	Calcium signaling pathway	15065	231	KEGG:00000
51	KEGG:04625	c(0.0375615146627133, 1, 0.000132340469518822, 1)	c(TRUE, FALSE, TRUE, FALSE)	47	c(1546, 492, 1753, 1485)	c(13, 3, 18, 6)	KEGG	C-type lectin receptor signaling pathway	15065	310	KEGG:00000
52	KEGG:00982	c(0.00351667033012353, 0.0295073870697146, 0.000142082311713542, 0.070477723100536)	c(TRUE, TRUE, TRUE, FALSE)	6	c(1546, 492, 1753, 1485)	c(5, 3, 6, 4)	KEGG	Drug metabolism - cytochrome P450	15065	156	KEGG:00000
53	KEGG:00860	c(0.000196788153620808, 1, 0.000573799494499504, 0.000145599896394864)	c(TRUE, FALSE, TRUE, TRUE)	15	c(1546, 492, 1753, 1485)	c(9, 2, 9, 9)	KEGG	Porphyrin and chlorophyll metabolism	15065	130	KEGG:00000
54	GO:0019752	c(0.0228123987481681, 1, 0.283532213564299, 0.000151867848347642)	c(TRUE, FALSE, FALSE, TRUE)	290	c(1546, 492, 1753, 1485)	c(58, 18, 60, 62)	GO:BP	carboxylic acid metabolic process	15065	6976	GO:0043436	1
55	GO:0042592	c(0.00023985682924315, 0.112599616812413, 0.00247945251461879, 0.0550316620695864)	c(TRUE, FALSE, TRUE, FALSE)	302	c(1546, 492, 1753, 1485)	c(65, 27, 68, 57)	GO:BP	homeostatic process	15065	11869	GO:0065008	6
56	GO:0009063	c(0.000270168002300524, 1, 0.069287951119945, 0.148437925633048)	c(TRUE, FALSE, FALSE, FALSE)	50	c(1546, 492, 1753, 1485)	c(21, 6, 19, 17)	GO:BP	cellular amino acid catabolic process	15065	3679	c("GO:0006520", "GO:0046395", "GO:1901565")	1
57	KEGG:00020	c(1, 1, 1, 0.000303604698244446)	c(FALSE, FALSE, FALSE, TRUE)	16	c(1546, 492, 1753, 1485)	c(2, 1, 5, 9)	KEGG	Citrate cycle (TCA cycle)	15065	3	KEGG:00000
58	GO:0043436	c(0.0410979145051075, 1, 0.494913362666268, 0.000304595612552526)	c(TRUE, FALSE, FALSE, TRUE)	295	c(1546, 492, 1753, 1485)	c(58, 18, 60, 62)	GO:BP	oxoacid metabolic process	15065	12355	GO:0006082	1
59	KEGG:04621	c(0.00181985759046275, 1, 0.000359559733478296, 0.561763026749903)	c(TRUE, FALSE, TRUE, FALSE)	79	c(1546, 492, 1753, 1485)	c(21, 6, 24, 15)	KEGG	NOD-like receptor signaling pathway	15065	306	KEGG:00000
60	GO:0002262	c(0.000415088027938979, 0.0294244119287639, 0.020170780180372, 0.00750537163725155)	c(TRUE, TRUE, TRUE, TRUE)	51	c(1546, 492, 1753, 1485)	c(21, 11, 20, 19)	GO:BP	myeloid cell homeostasis	15065	926	c("GO:0002376", "GO:0048872")	6
61	KEGG:04115	c(0.0436829131242691, 0.524908766787895, 0.000521788805627992, 0.384647635709754)	c(TRUE, FALSE, TRUE, FALSE)	42	c(1546, 492, 1753, 1485)	c(12, 5, 16, 10)	KEGG	p53 signaling pathway	15065	250	KEGG:00000
62	KEGG:04371	c(0.282272128862308, 0.0221988926444734, 0.000609211625024451, 0.200646626696849)	c(FALSE, TRUE, TRUE, FALSE)	71	c(1546, 492, 1753, 1485)	c(15, 9, 22, 15)	KEGG	Apelin signaling pathway	15065	288	KEGG:00000
63	KEGG:04137	c(0.0375615146627133, 1, 0.000621134788067569, 1)	c(TRUE, FALSE, TRUE, FALSE)	47	c(1546, 492, 1753, 1485)	c(13, 4, 17, 9)	KEGG	Mitophagy - animal	15065	255	KEGG:00000
64	KEGG:00040	c(0.0112615497931393, 1, 0.000895678061841973, 0.00963383856567439)	c(TRUE, FALSE, TRUE, TRUE)	7	c(1546, -1, 1753, 1485)	c(5, -1, 6, 5)	KEGG	Pentose and glucuronate interconversions	15065	5	KEGG:00000
65	GO:0055085	c(0.0138357480373917, 1, 0.00092362789282948, 0.31161264580337)	c(TRUE, FALSE, TRUE, FALSE)	568	c(1546, 492, 1753, 1485)	c(97, 24, 111, 89)	GO:BP	transmembrane transport	15065	16838	c("GO:0006810", "GO:0009987")	5
66	GO:0048869	c(0.0058473324586306, 1, 0.000943451521542217, 1)	c(TRUE, FALSE, TRUE, FALSE)	882	c(1546, 492, 1753, 1485)	c(139, 40, 157, 114)	GO:BP	cellular developmental process	15065	15203	c("GO:0009987", "GO:0032502")	4
67	KEGG:04145	c(0.468997470829881, 1, 0.00101808431795599, 1)	c(FALSE, FALSE, TRUE, FALSE)	68	c(1546, 492, 1753, 1485)	c(14, 5, 21, 12)	KEGG	Phagosome	15065	262	KEGG:00000
68	KEGG:00640	c(1, 1, 0.00440130679375666, 0.00105185822671156)	c(FALSE, FALSE, TRUE, TRUE)	22	c(1546, 492, 1753, 1485)	c(5, 1, 10, 10)	KEGG	Propanoate metabolism	15065	111	KEGG:00000
69	KEGG:00230	c(0.0862392571666607, 1, 0.0081054518037402, 0.00109031278958198)	c(FALSE, FALSE, TRUE, TRUE)	51	c(1546, 492, 1753, 1485)	c(13, 5, 16, 16)	KEGG	Purine metabolism	15065	23	KEGG:00000
70	GO:0046034	c(1, 1, 1, 0.00116490637964625)	c(FALSE, FALSE, FALSE, TRUE)	65	c(1546, 492, 1753, 1485)	c(11, 6, 20, 23)	GO:BP	ATP metabolic process	15065	13778	GO:0008152	8
71	KEGG:00983	c(0.00130247639609749, 0.062207214911576, 0.023323540286834, 0.0332935531789376)	c(TRUE, FALSE, TRUE, TRUE)	26	c(1546, 492, 1753, 1485)	c(11, 5, 10, 9)	KEGG	Drug metabolism - other enzymes	15065	157	KEGG:00000
72	KEGG:00270	c(0.00130247639609749, 1, 0.108577938967337, 0.0059754841384933)	c(TRUE, FALSE, FALSE, TRUE)	26	c(1546, 492, 1753, 1485)	c(11, 3, 9, 10)	KEGG	Cysteine and methionine metabolism	15065	31	KEGG:00000
73	GO:0046395	c(0.00136501614823223, 1, 0.0183425813849913, 0.0435487541554821)	c(TRUE, FALSE, TRUE, TRUE)	83	c(1546, 492, 1753, 1485)	c(27, 7, 27, 24)	GO:BP	carboxylic acid catabolic process	15065	14134	c("GO:0016054", "GO:0019752")	1
74	GO:0048872	c(0.0013932311830618, 0.0541279008847386, 0.059189189314821, 0.0213041508992136)	c(TRUE, FALSE, FALSE, TRUE)	54	c(1546, 492, 1753, 1485)	c(21, 11, 20, 19)	GO:BP	homeostasis of number of cells	15065	15206	GO:0042592	6
75	GO:0044282	c(0.0093414726078983, 1, 0.0014598880943169, 0.0127804653529011)	c(TRUE, FALSE, TRUE, TRUE)	118	c(1546, 492, 1753, 1485)	c(32, 8, 36, 31)	GO:BP	small molecule catabolic process	15065	12754	c("GO:0009056", "GO:0044281")	1
76	GO:1901606	c(0.00152552797159226, 1, 0.351035554652242, 1)	c(TRUE, FALSE, FALSE, FALSE)	37	c(1546, 492, 1753, 1485)	c(17, 4, 15, 13)	GO:BP	alpha-amino acid catabolic process	15065	24858	c("GO:0016054", "GO:1901565", "GO:1901605")	1
77	GO:0030154	c(0.0182059521640999, 1, 0.00162755993506989, 1)	c(TRUE, FALSE, TRUE, FALSE)	875	c(1546, 492, 1753, 1485)	c(136, 39, 155, 112)	GO:BP	cell differentiation	15065	7739	GO:0048869	4
78	KEGG:04620	c(0.00844369751430014, 1, 0.00174402603350932, 1)	c(TRUE, FALSE, TRUE, FALSE)	41	c(1546, 492, 1753, 1485)	c(13, 3, 15, 6)	KEGG	Toll-like receptor signaling pathway	15065	305	KEGG:00000
79	KEGG:03060	c(0.144726031248017, 1, 1, 0.00175560143182899)	c(FALSE, FALSE, FALSE, TRUE)	15	c(1546, 492, 1753, 1485)	c(6, 2, 4, 8)	KEGG	Protein export	15065	215	KEGG:00000
80	KEGG:04512	c(1, 1, 0.0135255937295132, 0.00226630471702039)	c(FALSE, FALSE, TRUE, TRUE)	43	c(1546, 492, 1753, 1485)	c(8, 3, 14, 14)	KEGG	ECM-receptor interaction	15065	294	KEGG:00000
81	KEGG:00600	c(0.00335747200764704, 0.186062418908701, 0.00238474312263915, 0.0548097717393832)	c(TRUE, FALSE, TRUE, FALSE)	33	c(1546, 492, 1753, 1485)	c(12, 5, 13, 10)	KEGG	Sphingolipid metabolism	15065	97	KEGG:00000
82	KEGG:00330	c(1, 0.378109067018683, 0.00277965098003611, 0.512850548568245)	c(FALSE, FALSE, TRUE, FALSE)	25	c(1546, 492, 1753, 1485)	c(6, 4, 11, 7)	KEGG	Arginine and proline metabolism	15065	38	KEGG:00000
83	GO:0009074	c(0.00280371582769248, 1, 1, 0.0550039518506836)	c(TRUE, FALSE, FALSE, FALSE)	11	c(1546, 492, 1753, 1485)	c(9, 2, 6, 8)	GO:BP	aromatic amino acid family catabolic process	15065	3690	c("GO:0009072", "GO:0016054", "GO:0019439", "GO:1901361", "GO:1901565")	1
84	GO:0055086	c(1, 1, 1, 0.00331848162240417)	c(FALSE, FALSE, FALSE, TRUE)	211	c(1546, 492, 1753, 1485)	c(38, 14, 40, 47)	GO:BP	nucleobase-containing small molecule metabolic process	15065	16839	c("GO:0006139", "GO:0044281")	1
85	GO:0009611	c(0.003461731731496, 1, 0.0388932343939929, 1)	c(TRUE, FALSE, TRUE, FALSE)	76	c(1546, 492, 1753, 1485)	c(25, 11, 25, 20)	GO:BP	response to wounding	15065	3996	GO:0006950	9
86	KEGG:04210	c(0.050387262880545, 1, 0.00383266063414549, 1)	c(FALSE, FALSE, TRUE, FALSE)	79	c(1546, 492, 1753, 1485)	c(18, 6, 22, 13)	KEGG	Apoptosis	15065	267	KEGG:00000
87	GO:0016054	c(0.00414656386608434, 1, 0.0144048570749863, 0.0295031932607408)	c(TRUE, FALSE, TRUE, TRUE)	87	c(1546, 492, 1753, 1485)	c(27, 7, 28, 25)	GO:BP	organic acid catabolic process	15065	5674	c("GO:0006082", "GO:0044248", "GO:0044282", "GO:1901575")	1
88	GO:0032502	c(0.0357031635776662, 1, 0.00522491755242897, 1)	c(TRUE, FALSE, TRUE, FALSE)	1735	c(1546, 492, 1753, 1485)	c(238, 73, 270, 210)	GO:BP	developmental process	15065	8832	GO:0008150	4
89	KEGG:00410	c(1, 1, 0.00576558653592303, 1)	c(FALSE, FALSE, TRUE, FALSE)	15	c(1546, 492, 1753, 1485)	c(3, 1, 8, 4)	KEGG	beta-Alanine metabolism	15065	57	KEGG:00000
90	KEGG:04520	c(0.0236819201593915, 1, 0.00603646715928688, 1)	c(TRUE, FALSE, TRUE, FALSE)	45	c(1546, 492, 1753, 1485)	c(13, 3, 15, 6)	KEGG	Adherens junction	15065	296	KEGG:00000
91	KEGG:00280	c(1, 1, 0.111604049303895, 0.00623627541957909)	c(FALSE, FALSE, FALSE, TRUE)	36	c(1546, 492, 1753, 1485)	c(5, 3, 11, 12)	KEGG	Valine, leucine and isoleucine degradation	15065	32	KEGG:00000
92	GO:0022904	c(1, 1, 1, 0.00632523679217997)	c(FALSE, FALSE, FALSE, TRUE)	37	c(1546, 492, 1753, 1485)	c(6, 4, 11, 16)	GO:BP	respiratory electron transport chain	15065	7639	c("GO:0022900", "GO:0045333")	2
93	KEGG:04623	c(0.110907190166698, 1, 0.00684649853643248, 0.469132368706141)	c(FALSE, FALSE, TRUE, FALSE)	19	c(1546, 492, 1753, 1485)	c(7, 2, 9, 6)	KEGG	Cytosolic DNA-sensing pathway	15065	308	KEGG:00000
94	KEGG:00563	c(0.00710444204942293, 1, 0.111002202283216, 0.0418739666954812)	c(TRUE, FALSE, FALSE, TRUE)	17	c(1546, 492, 1753, 1485)	c(8, 2, 7, 7)	KEGG	Glycosylphosphatidylinositol (GPI)-anchor biosynthesis	15065	89	KEGG:00000
95	GO:0043277	c(1, 1, 0.00847582078898002, 1)	c(FALSE, FALSE, TRUE, FALSE)	11	c(1546, 492, 1753, 1485)	c(5, 4, 9, 7)	GO:BP	apoptotic cell clearance	15065	12257	GO:0006909	5
96	KEGG:00565	c(0.0100272551203527, 1, 0.026620953916488, 0.0464427820054092)	c(TRUE, FALSE, TRUE, TRUE)	22	c(1546, 492, 1753, 1485)	c(9, 2, 9, 8)	KEGG	Ether lipid metabolism	15065	91	KEGG:00000
97	KEGG:00052	c(1, 0.647695783406761, 0.0103554022559324, 0.0269111009989235)	c(FALSE, FALSE, TRUE, TRUE)	16	c(1546, 492, 1753, 1485)	c(5, 3, 8, 7)	KEGG	Galactose metabolism	15065	7	KEGG:00000
98	GO:0048513	c(0.265362701543787, 1, 0.0105879063874782, 1)	c(FALSE, FALSE, TRUE, FALSE)	943	c(1546, 492, 1753, 1485)	c(139, 50, 161, 131)	GO:BP	animal organ development	15065	14880	c("GO:0048731", "GO:0048856")	4
99	KEGG:00620	c(1, 1, 0.0107189698250154, 0.0893152996884751)	c(FALSE, FALSE, TRUE, FALSE)	24	c(1546, 492, 1753, 1485)	c(6, 2, 10, 8)	KEGG	Pyruvate metabolism	15065	101	KEGG:00000
100	GO:0019646	c(1, 1, 1, 0.0122358155287891)	c(FALSE, FALSE, FALSE, TRUE)	30	c(1546, 492, 1753, 1485)	c(5, 3, 10, 14)	GO:BP	aerobic electron transport chain	15065	6890	c("GO:0006119", "GO:0009060", "GO:0022904")	2
101	GO:0042775	c(1, 1, 1, 0.0122358155287891)	c(FALSE, FALSE, FALSE, TRUE)	30	c(1546, 492, 1753, 1485)	c(5, 3, 10, 14)	GO:BP	mitochondrial ATP synthesis coupled electron transport	15065	11985	GO:0042773	2
102	GO:0015980	c(1, 1, 1, 0.0123228083643436)	c(FALSE, FALSE, FALSE, TRUE)	89	c(1546, 492, 1753, 1485)	c(11, 5, 24, 26)	GO:BP	energy derivation by oxidation of organic compounds	15065	5642	GO:0006091	2
103	KEGG:04010	c(0.653768779774717, 0.123925346358594, 0.012406395972994, 1)	c(FALSE, FALSE, TRUE, FALSE)	144	c(1546, 492, 1753, 1485)	c(24, 12, 32, 16)	KEGG	MAPK signaling pathway	15065	224	KEGG:00000
104	KEGG:04216	c(0.110907190166698, 1, 1, 0.0143717937534347)	c(FALSE, FALSE, FALSE, TRUE)	19	c(1546, 492, 1753, 1485)	c(7, 3, 6, 8)	KEGG	Ferroptosis	15065	273	KEGG:00000
105	GO:0097530	c(0.0158478209653615, 1, 0.0625414827412305, 1)	c(TRUE, FALSE, FALSE, FALSE)	22	c(1546, 492, 1753, 1485)	c(12, 5, 12, 9)	GO:BP	granulocyte migration	15065	21930	GO:0097529	5
106	KEGG:00510	c(0.34106709181632, 1, 1, 0.0162573258054412)	c(FALSE, FALSE, FALSE, TRUE)	34	c(1546, 492, 1753, 1485)	c(9, 1, 8, 11)	KEGG	N-Glycan biosynthesis	15065	67	KEGG:00000
107	KEGG:04068	c(1, 1, 0.0169573701169984, 1)	c(FALSE, FALSE, TRUE, FALSE)	70	c(1546, 492, 1753, 1485)	c(7, 4, 19, 8)	KEGG	FoxO signaling pathway	15065	239	KEGG:00000
108	KEGG:00512	c(0.0514540349065713, 1, 0.0175689235192431, 1)	c(FALSE, FALSE, TRUE, FALSE)	17	c(1546, 492, 1753, 1485)	c(7, 2, 8, 5)	KEGG	Mucin type O-glycan biosynthesis	15065	69	KEGG:00000
109	KEGG:00500	c(1, 1, 0.0175689235192431, 0.0418739666954812)	c(FALSE, FALSE, TRUE, TRUE)	17	c(1546, 492, 1753, 1485)	c(3, 2, 8, 7)	KEGG	Starch and sucrose metabolism	15065	66	KEGG:00000
110	GO:0034101	c(0.0179186558295081, 1, 0.538523861254582, 1)	c(TRUE, FALSE, FALSE, FALSE)	47	c(1546, 492, 1753, 1485)	c(18, 8, 17, 15)	GO:BP	erythrocyte homeostasis	15065	9697	GO:0002262	6
111	KEGG:00790	c(0.0191835114732827, 1, 0.308704141065172, 0.151070161049157)	c(TRUE, FALSE, FALSE, FALSE)	11	c(1546, 492, 1753, 1485)	c(6, 1, 5, 5)	KEGG	Folate biosynthesis	15065	127	KEGG:00000
112	GO:0042773	c(1, 1, 1, 0.0202909559886193)	c(FALSE, FALSE, FALSE, TRUE)	31	c(1546, 492, 1753, 1485)	c(5, 3, 10, 14)	GO:BP	ATP synthesis coupled electron transport	15065	11983	c("GO:0006119", "GO:0022904")	2
113	KEGG:04270	c(0.0707995385468334, 1, 0.022443685423359, 0.489607255970265)	c(FALSE, FALSE, TRUE, FALSE)	50	c(1546, 492, 1753, 1485)	c(13, 3, 15, 11)	KEGG	Vascular smooth muscle contraction	15065	278	KEGG:00000
114	GO:0002376	c(0.0228480567717028, 1, 0.0605473151356706, 1)	c(TRUE, FALSE, FALSE, FALSE)	425	c(1546, 492, 1753, 1485)	c(77, 28, 83, 58)	GO:BP	immune system process	15065	1038	GO:0008150	11
115	GO:0045333	c(1, 1, 1, 0.0275470540246268)	c(FALSE, FALSE, FALSE, TRUE)	65	c(1546, 492, 1753, 1485)	c(7, 4, 17, 21)	GO:BP	cellular respiration	15065	13267	GO:0015980	2
116	GO:0030099	c(0.0275693435154747, 1, 0.864754169112969, 1)	c(TRUE, FALSE, FALSE, FALSE)	73	c(1546, 492, 1753, 1485)	c(23, 9, 22, 17)	GO:BP	myeloid cell differentiation	15065	7725	c("GO:0030097", "GO:0030154")	4
117	GO:0048856	c(0.251113480825896, 1, 0.0336056133273518, 1)	c(FALSE, FALSE, TRUE, FALSE)	1650	c(1546, 492, 1753, 1485)	c(223, 70, 254, 198)	GO:BP	anatomical structure development	15065	15191	GO:0032502	4
118	GO:0072359	c(1, 1, 0.0339813186333555, 1)	c(FALSE, FALSE, TRUE, FALSE)	348	c(1546, 492, 1753, 1485)	c(52, 24, 72, 51)	GO:BP	circulatory system development	15065	20273	GO:0048731	4
119	GO:0006811	c(1, 1, 0.0340021922351213, 1)	c(FALSE, FALSE, TRUE, FALSE)	439	c(1546, 492, 1753, 1485)	c(67, 19, 86, 69)	GO:BP	ion transport	15065	2780	GO:0006810	5
120	GO:1990266	c(0.04481938017279, 1, 0.158215369680419, 1)	c(TRUE, FALSE, FALSE, FALSE)	20	c(1546, 492, 1753, 1485)	c(11, 4, 11, 8)	GO:BP	neutrophil migration	15065	28891	GO:0097530	5
121	KEGG:04350	c(0.188766140713233, 1, 0.0498695834569245, 1)	c(FALSE, FALSE, TRUE, FALSE)	43	c(1546, 492, 1753, 1485)	c(11, 2, 13, 8)	KEGG	TGF-beta signaling pathway	15065	284	KEGG:00000

## Sheet: up-regulated
Supplementary Table 1. Gene ontology and KEGG pathway enrichment analysis for genes upregulated in CPT24-48, CPT48-72, Ola2-24, Ola48-72 samples repectively. The last column "cluster", represents the member terms belonging to each cluster identified using "simplify enrichment".
	term_id	p_values	significant	term_size	query_sizes	intersection_sizes	source	term_name	effective_domain_size	source_order	parents	cluster
1	KEGG:00000	c(3.70957860846834e-71, 2.26332700561411e-28, 7.32791387931261e-86, 8.07484480890928e-51)	c(TRUE, TRUE, TRUE, TRUE)	2787	c(2848, 1439, 3091, 2618)	c(881, 435, 973, 773)	KEGG	KEGG root term	15065	1	character(0)
2	GO:0090304	c(9.51939956031395e-26, 2.71898873985874e-05, 4.47739324611584e-47, 1.16137269845761e-35)	c(TRUE, TRUE, TRUE, TRUE)	2342	c(2848, 1439, 3091, 2618)	c(650, 307, 765, 642)	GO:BP	nucleic acid metabolic process	15065	21373	c("GO:0006139", "GO:0043170")	1
3	GO:0006139	c(7.98298721764137e-23, 0.00330348905727153, 4.77942875776027e-44, 1.23681092239386e-28)	c(TRUE, TRUE, TRUE, TRUE)	2553	c(2848, 1439, 3091, 2618)	c(685, 318, 808, 662)	GO:BP	nucleobase-containing compound metabolic process	15065	2173	c("GO:0006725", "GO:0034641", "GO:0044238", "GO:0046483", "GO:1901360")	1
4	GO:0046483	c(1.85683724342416e-20, 0.0383354715458593, 5.75428187497626e-42, 6.43304652081779e-26)	c(TRUE, TRUE, TRUE, TRUE)	2617	c(2848, 1439, 3091, 2618)	c(689, 318, 817, 665)	GO:BP	heterocycle metabolic process	15065	14204	GO:0044237	1
5	GO:0006725	c(6.58065210541306e-20, 0.040449584063069, 1.88665890801862e-41, 2.47211760727323e-25)	c(TRUE, TRUE, TRUE, TRUE)	2628	c(2848, 1439, 3091, 2618)	c(689, 319, 818, 665)	GO:BP	cellular aromatic compound metabolic process	15065	2705	GO:0044237	1
6	GO:1901360	c(1.31474869089045e-18, 0.166774774878328, 1.34045352864405e-39, 1.55276518011781e-24)	c(TRUE, FALSE, TRUE, TRUE)	2678	c(2848, 1439, 3091, 2618)	c(694, 320, 824, 672)	GO:BP	organic cyclic compound metabolic process	15065	24636	GO:0071704	1
7	GO:0034641	c(6.5688989342482e-17, 1, 1.29837835639495e-38, 2.32328330423629e-18)	c(TRUE, FALSE, TRUE, TRUE)	2955	c(2848, 1439, 3091, 2618)	c(745, 340, 887, 701)	GO:BP	cellular nitrogen compound metabolic process	15065	10027	c("GO:0006807", "GO:0044237")	1
8	GO:0043170	c(2.60794911510647e-19, 0.0023490457199098, 1.96222374031743e-35, 8.62191698071486e-29)	c(TRUE, TRUE, TRUE, TRUE)	4621	c(2848, 1439, 3091, 2618)	c(1100, 532, 1256, 1066)	GO:BP	macromolecule metabolic process	15065	12224	GO:0071704	1
9	GO:0016070	c(5.62495046051436e-18, 9.05231027391806e-06, 5.50079870757327e-34, 1.59705360898696e-27)	c(TRUE, TRUE, TRUE, TRUE)	2056	c(2848, 1439, 3091, 2618)	c(556, 278, 653, 555)	GO:BP	RNA metabolic process	15065	5687	GO:0090304	1
10	GO:0007399	c(3.5366672830234e-18, 9.27333871796644e-34, 5.44134567787875e-11, 4.29161137791013e-24)	c(TRUE, TRUE, TRUE, TRUE)	614	c(2848, 1439, 3091, 2618)	c(217, 168, 209, 219)	GO:BP	nervous system development	15065	3289	GO:0048731	2
11	GO:0044237	c(2.97102249997596e-16, 0.584310309754232, 6.36596681800669e-32, 3.47318909019719e-17)	c(TRUE, FALSE, TRUE, TRUE)	5196	c(2848, 1439, 3091, 2618)	c(1198, 570, 1367, 1117)	GO:BP	cellular metabolic process	15065	12725	c("GO:0008152", "GO:0009987")	1
12	GO:0048731	c(3.28106878915425e-22, 1.00829853379789e-31, 7.39984465617889e-11, 7.16455698239654e-21)	c(TRUE, TRUE, TRUE, TRUE)	1339	c(2848, 1439, 3091, 2618)	c(408, 272, 391, 379)	GO:BP	system development	15065	15076	c("GO:0007275", "GO:0048856")	2
13	GO:0048856	c(2.65070543152423e-22, 1.75160729677606e-31, 5.708523068276e-11, 1.11750647285811e-24)	c(TRUE, TRUE, TRUE, TRUE)	1650	c(2848, 1439, 3091, 2618)	c(481, 313, 466, 459)	GO:BP	anatomical structure development	15065	15191	GO:0032502	2
14	GO:0010467	c(9.64891621214183e-15, 0.000665133029437272, 2.03882265371642e-30, 1.84083753404752e-21)	c(TRUE, TRUE, TRUE, TRUE)	2421	c(2848, 1439, 3091, 2618)	c(621, 308, 730, 608)	GO:BP	gene expression	15065	4661	GO:0043170	1
15	GO:0006807	c(1.63453054247259e-14, 0.881666713318607, 4.80560885210336e-30, 5.78358220747909e-18)	c(TRUE, FALSE, TRUE, TRUE)	4949	c(2848, 1439, 3091, 2618)	c(1139, 544, 1305, 1076)	GO:BP	nitrogen compound metabolic process	15065	2776	GO:0008152	1
16	GO:0032502	c(5.72367628856322e-20, 4.37591931884751e-29, 6.26048806419236e-10, 7.78902006448501e-23)	c(TRUE, TRUE, TRUE, TRUE)	1735	c(2848, 1439, 3091, 2618)	c(492, 318, 481, 471)	GO:BP	developmental process	15065	8832	GO:0008150	2
17	GO:0022008	c(1.93816505561147e-14, 1.41173997662745e-28, 1.69195945664278e-08, 3.47982379997108e-18)	c(TRUE, TRUE, TRUE, TRUE)	419	c(2848, 1439, 3091, 2618)	c(156, 126, 149, 156)	GO:BP	neurogenesis	15065	7567	c("GO:0007399", "GO:0030154")	2
18	GO:0007275	c(4.65997738296229e-22, 1.55406044053337e-28, 3.33024349734867e-11, 1.92579893784926e-23)	c(TRUE, TRUE, TRUE, TRUE)	1507	c(2848, 1439, 3091, 2618)	c(447, 287, 433, 424)	GO:BP	multicellular organism development	15065	3179	c("GO:0032501", "GO:0048856")	2
19	GO:0030154	c(1.95500955518817e-16, 5.54884461393167e-27, 1.06123143842816e-07, 1.45367224385226e-16)	c(TRUE, TRUE, TRUE, TRUE)	875	c(2848, 1439, 3091, 2618)	c(278, 196, 264, 262)	GO:BP	cell differentiation	15065	7739	GO:0048869	2
20	GO:0048699	c(1.72112977132409e-16, 8.0060276631944e-27, 2.31140258743863e-08, 7.60060932348552e-17)	c(TRUE, TRUE, TRUE, TRUE)	384	c(2848, 1439, 3091, 2618)	c(151, 117, 139, 144)	GO:BP	generation of neurons	15065	15044	GO:0022008	2
21	GO:0048869	c(3.32889001411906e-16, 1.71689839820134e-26, 1.59723122163667e-07, 4.90659400039327e-16)	c(TRUE, TRUE, TRUE, TRUE)	882	c(2848, 1439, 3091, 2618)	c(279, 196, 265, 262)	GO:BP	cellular developmental process	15065	15203	c("GO:0009987", "GO:0032502")	2
22	GO:0060255	c(4.02415875268242e-11, 1.83814548388138e-16, 1.84400164927097e-12, 3.43629081248102e-26)	c(TRUE, TRUE, TRUE, TRUE)	1959	c(2848, 1439, 3091, 2618)	c(504, 309, 546, 530)	GO:BP	regulation of macromolecule metabolic process	15065	17082	c("GO:0019222", "GO:0043170")	1
23	GO:0048468	c(8.38832469439594e-15, 8.7003337001195e-26, 9.87283423430765e-06, 4.56564769222534e-13)	c(TRUE, TRUE, TRUE, TRUE)	540	c(2848, 1439, 3091, 2618)	c(189, 142, 172, 174)	GO:BP	cell development	15065	14850	c("GO:0030154", "GO:0048856", "GO:0048869")	2
24	GO:0044238	c(5.74753951943834e-14, 0.699632174296854, 1.64082828091902e-25, 6.28152800813349e-15)	c(TRUE, FALSE, TRUE, TRUE)	5254	c(2848, 1439, 3091, 2618)	c(1196, 575, 1350, 1115)	GO:BP	primary metabolic process	15065	12726	GO:0008152	1
25	GO:0019219	c(1.18085943213124e-10, 1.8781502555914e-17, 4.66616246271973e-12, 3.01440418317103e-25)	c(TRUE, TRUE, TRUE, TRUE)	1458	c(2848, 1439, 3091, 2618)	c(392, 251, 425, 419)	GO:BP	regulation of nucleobase-containing compound metabolic process	15065	6493	c("GO:0006139", "GO:0031323", "GO:0051171", "GO:0080090")	1
26	GO:0044260	c(4.49497029125035e-15, 1.94984569181977e-06, 5.60606740720024e-25, 3.32431444821756e-24)	c(TRUE, TRUE, TRUE, TRUE)	3859	c(2848, 1439, 3091, 2618)	c(923, 474, 1041, 902)	GO:BP	cellular macromolecule metabolic process	15065	12740	c("GO:0043170", "GO:0044237")	1
27	GO:0019222	c(1.24248166522865e-09, 1.44294945416386e-15, 1.02063515534597e-10, 3.33629778467574e-24)	c(TRUE, TRUE, TRUE, TRUE)	2078	c(2848, 1439, 3091, 2618)	c(522, 320, 565, 548)	GO:BP	regulation of metabolic process	15065	6496	c("GO:0008152", "GO:0050789")	1
28	GO:0071704	c(4.43372598724612e-12, 1, 3.70058117681294e-24, 1.80067797782182e-14)	c(TRUE, FALSE, TRUE, TRUE)	5462	c(2848, 1439, 3091, 2618)	c(1225, 587, 1388, 1150)	GO:BP	organic substance metabolic process	15065	19739	GO:0008152	1
29	GO:0010468	c(3.17325545603317e-09, 5.81486768884012e-18, 1.22710996679331e-11, 6.85345081085147e-24)	c(TRUE, TRUE, TRUE, TRUE)	1574	c(2848, 1439, 3091, 2618)	c(411, 267, 451, 440)	GO:BP	regulation of gene expression	15065	4662	c("GO:0010467", "GO:0060255")	1
30	GO:0030182	c(8.4934321697433e-15, 7.05977740605148e-24, 4.91964884367726e-07, 5.91452866047253e-15)	c(TRUE, TRUE, TRUE, TRUE)	365	c(2848, 1439, 3091, 2618)	c(142, 109, 130, 135)	GO:BP	neuron differentiation	15065	7753	c("GO:0030154", "GO:0048699")	2
31	GO:0051171	c(3.95746028407953e-10, 2.03852553285059e-16, 7.24842507148025e-11, 1.93055518534655e-23)	c(TRUE, TRUE, TRUE, TRUE)	1843	c(2848, 1439, 3091, 2618)	c(474, 295, 511, 496)	GO:BP	regulation of nitrogen compound metabolic process	15065	15686	c("GO:0006807", "GO:0019222")	1
32	GO:0032501	c(7.78243093738878e-18, 3.3295574730808e-23, 7.15879653035806e-07, 3.81012377247728e-18)	c(TRUE, TRUE, TRUE, TRUE)	1749	c(2848, 1439, 3091, 2618)	c(487, 304, 468, 457)	GO:BP	multicellular organismal process	15065	8831	GO:0008150	2
33	GO:0080090	c(8.90121979270454e-10, 1.27661337304674e-15, 1.23416003403285e-10, 5.66182074318409e-23)	c(TRUE, TRUE, TRUE, TRUE)	1865	c(2848, 1439, 3091, 2618)	c(477, 295, 515, 499)	GO:BP	regulation of primary metabolic process	15065	20913	c("GO:0019222", "GO:0044238")	1
34	GO:0031323	c(1.76639066041437e-08, 3.40926139294594e-14, 1.3886717454086e-09, 2.46875126537089e-22)	c(TRUE, TRUE, TRUE, TRUE)	1957	c(2848, 1439, 3091, 2618)	c(490, 301, 531, 516)	GO:BP	regulation of cellular metabolic process	15065	8281	c("GO:0019222", "GO:0044237", "GO:0050794")	1
35	GO:0051252	c(1.24789020269879e-08, 1.22398071853213e-17, 3.60995906285615e-10, 2.72766385854856e-22)	c(TRUE, TRUE, TRUE, TRUE)	1414	c(2848, 1439, 3091, 2618)	c(373, 246, 406, 400)	GO:BP	regulation of RNA metabolic process	15065	15753	c("GO:0016070", "GO:0019219", "GO:0060255")	1
36	GO:0008152	c(5.36852364151821e-11, 1, 2.99392052288218e-22, 5.95961872196309e-12)	c(TRUE, FALSE, TRUE, TRUE)	5714	c(2848, 1439, 3091, 2618)	c(1267, 609, 1432, 1180)	GO:BP	metabolic process	15065	3544	GO:0008150	1
37	GO:0006396	c(6.01758989575924e-06, 1, 2.58493676007069e-21, 0.00144479075799162)	c(TRUE, FALSE, TRUE, TRUE)	513	c(2848, 1439, 3091, 2618)	c(156, 40, 208, 138)	GO:BP	RNA processing	15065	2400	c("GO:0010467", "GO:0016070")	1
38	GO:0016043	c(5.48888512605831e-18, 7.67501400859084e-12, 6.55724954287589e-12, 7.95569451614926e-21)	c(TRUE, TRUE, TRUE, TRUE)	1979	c(2848, 1439, 3091, 2618)	c(539, 295, 548, 515)	GO:BP	cellular component organization	15065	5665	GO:0071840	3
39	GO:0071840	c(3.30522972374477e-19, 2.17939793928358e-08, 1.13629353020121e-16, 2.71381689686217e-20)	c(TRUE, TRUE, TRUE, TRUE)	2110	c(2848, 1439, 3091, 2618)	c(573, 296, 601, 540)	GO:BP	cellular component organization or biogenesis	15065	19815	GO:0009987	3
40	GO:2000112	c(1.37134996460602e-05, 7.52051189970489e-14, 1.59941510232432e-08, 4.5882617295733e-20)	c(TRUE, TRUE, TRUE, TRUE)	1434	c(2848, 1439, 3091, 2618)	c(362, 237, 403, 397)	GO:BP	regulation of cellular macromolecule biosynthetic process	15065	29314	c("GO:0010556", "GO:0031326", "GO:0034645")	1
41	GO:0010556	c(1.80180477218678e-05, 9.81924889423891e-14, 1.39616322160794e-08, 7.1270787013921e-20)	c(TRUE, TRUE, TRUE, TRUE)	1437	c(2848, 1439, 3091, 2618)	c(362, 237, 404, 397)	GO:BP	regulation of macromolecule biosynthetic process	15065	4720	c("GO:0009059", "GO:0009889", "GO:0060255")	1
42	GO:0009653	c(5.36087921444564e-12, 1.50347357110738e-19, 0.00470446782511489, 2.31153473046954e-09)	c(TRUE, TRUE, TRUE, TRUE)	814	c(2848, 1439, 3091, 2618)	c(249, 171, 228, 225)	GO:BP	anatomical structure morphogenesis	15065	4034	c("GO:0032502", "GO:0048856")	2
43	GO:0031326	c(4.95901037806931e-05, 1.96078687525e-13, 3.22723223593973e-08, 1.89161927007236e-19)	c(TRUE, TRUE, TRUE, TRUE)	1453	c(2848, 1439, 3091, 2618)	c(363, 238, 406, 399)	GO:BP	regulation of cellular biosynthetic process	15065	8284	c("GO:0009889", "GO:0031323", "GO:0044249")	1
44	GO:0009889	c(5.90707621724254e-05, 2.33423807724976e-13, 4.01592571279566e-08, 2.52177401603163e-19)	c(TRUE, TRUE, TRUE, TRUE)	1455	c(2848, 1439, 3091, 2618)	c(363, 238, 406, 399)	GO:BP	regulation of biosynthetic process	15065	4222	c("GO:0009058", "GO:0019222")	1
45	GO:0048666	c(1.35514364732945e-12, 3.29845273716988e-19, 3.07448892406784e-05, 1.08615227335826e-11)	c(TRUE, TRUE, TRUE, TRUE)	300	c(2848, 1439, 3091, 2618)	c(119, 90, 107, 111)	GO:BP	neuron development	15065	15012	c("GO:0030182", "GO:0048468")	2
46	GO:0006355	c(3.91963862745592e-05, 9.84136946213047e-14, 1.63293632084021e-06, 7.18425064046502e-18)	c(TRUE, TRUE, TRUE, TRUE)	1316	c(2848, 1439, 3091, 2618)	c(334, 222, 365, 364)	GO:BP	regulation of transcription, DNA-templated	15065	2366	c("GO:0006351", "GO:0010468", "GO:1903506", "GO:2000112")	1
47	GO:1903506	c(3.91963862745592e-05, 9.84136946213047e-14, 1.63293632084021e-06, 7.18425064046502e-18)	c(TRUE, TRUE, TRUE, TRUE)	1316	c(2848, 1439, 3091, 2618)	c(334, 222, 365, 364)	GO:BP	regulation of nucleic acid-templated transcription	15065	26535	c("GO:0097659", "GO:2001141")	1
48	GO:2001141	c(4.29990164622981e-05, 1.079845203149e-13, 1.81470579529578e-06, 8.31038049206432e-18)	c(TRUE, TRUE, TRUE, TRUE)	1317	c(2848, 1439, 3091, 2618)	c(334, 222, 365, 364)	GO:BP	regulation of RNA biosynthetic process	15065	30294	c("GO:0010556", "GO:0031326", "GO:0032774", "GO:0051252")	1
49	GO:0009987	c(3.80425427393122e-14, 1.35280768348012e-07, 1.02091263655077e-17, 4.73678219256961e-14)	c(TRUE, TRUE, TRUE, TRUE)	8753	c(2848, 1439, 3091, 2618)	c(1862, 958, 2031, 1721)	GO:BP	cellular process	15065	4286	GO:0008150	19
50	GO:0032774	c(1.64549025710625e-05, 9.08600899943999e-11, 8.0351176879214e-08, 2.35961769622611e-17)	c(TRUE, TRUE, TRUE, TRUE)	1436	c(2848, 1439, 3091, 2618)	c(362, 227, 400, 388)	GO:BP	RNA biosynthetic process	15065	9045	c("GO:0009059", "GO:0016070", "GO:0034654")	1
51	GO:0006351	c(3.17053740013649e-05, 7.74321596328899e-11, 1.61045140038644e-07, 3.408679978755e-17)	c(TRUE, TRUE, TRUE, TRUE)	1434	c(2848, 1439, 3091, 2618)	c(360, 227, 398, 387)	GO:BP	transcription, DNA-templated	15065	2362	c("GO:0010467", "GO:0034645", "GO:0097659")	1
52	GO:0097659	c(3.17053740013649e-05, 7.74321596328899e-11, 1.61045140038644e-07, 3.408679978755e-17)	c(TRUE, TRUE, TRUE, TRUE)	1434	c(2848, 1439, 3091, 2618)	c(360, 227, 398, 387)	GO:BP	nucleic acid-templated transcription	15065	21966	GO:0032774	1
53	GO:0031175	c(4.7577012365918e-09, 5.38511773211455e-17, 0.00829480347070662, 4.44424288517385e-08)	c(TRUE, TRUE, TRUE, TRUE)	242	c(2848, 1439, 3091, 2618)	c(95, 76, 84, 88)	GO:BP	neuron projection development	15065	8239	c("GO:0048666", "GO:0120036")	2
54	KEGG:04110	c(4.24081700573694e-09, 0.0253975923105528, 5.98977476819014e-17, 1.64854486535168e-12)	c(TRUE, TRUE, TRUE, TRUE)	80	c(2848, 1439, 3091, 2618)	c(41, 18, 53, 44)	KEGG	Cell cycle	15065	245	KEGG:00000
55	KEGG:03015	c(1.36298798267041e-11, 4.03357204966609e-05, 7.12282697751998e-17, 1.06477331952066e-10)	c(TRUE, TRUE, TRUE, TRUE)	47	c(2848, 1439, 3091, 2618)	c(32, 17, 38, 30)	KEGG	mRNA surveillance pathway	15065	208	KEGG:00000
56	GO:0065007	c(0.00196897485011871, 8.59789271196737e-17, 1, 2.06165655207294e-14)	c(TRUE, TRUE, FALSE, TRUE)	4554	c(2848, 1439, 3091, 2618)	c(981, 596, 1014, 984)	GO:BP	biological regulation	15065	18663	GO:0008150	15
57	GO:0050789	c(0.000160289560492942, 8.76293671418566e-17, 1, 3.45725547587087e-16)	c(TRUE, TRUE, FALSE, TRUE)	4200	c(2848, 1439, 3091, 2618)	c(921, 559, 947, 928)	GO:BP	regulation of biological process	15065	15367	c("GO:0008150", "GO:0065007")	14
58	KEGG:03013	c(1.74365002599316e-07, 1, 1.05535776869358e-16, 8.26166855221482e-07)	c(TRUE, FALSE, TRUE, TRUE)	88	c(2848, 1439, 3091, 2618)	c(41, 13, 56, 38)	KEGG	RNA transport	15065	207	KEGG:00000
59	GO:0000902	c(1.42647804910081e-05, 5.73997441902034e-16, 1, 4.59387287403121e-06)	c(TRUE, TRUE, FALSE, TRUE)	273	c(2848, 1439, 3091, 2618)	c(95, 80, 82, 91)	GO:BP	cell morphogenesis	15065	306	GO:0009653	2
60	GO:0050794	c(0.00409302593535012, 4.10202720433246e-15, 1, 1.53952075752316e-15)	c(TRUE, TRUE, FALSE, TRUE)	4010	c(2848, 1439, 3091, 2618)	c(871, 532, 896, 889)	GO:BP	regulation of cellular process	15065	15371	c("GO:0009987", "GO:0050789")	1
61	GO:0006996	c(2.70123514992446e-09, 0.00359614808477711, 5.23069353195857e-08, 5.29659720037552e-15)	c(TRUE, TRUE, TRUE, TRUE)	1373	c(2848, 1439, 3091, 2618)	c(367, 189, 386, 366)	GO:BP	organelle organization	15065	2933	GO:0016043	3
62	GO:0008150	c(4.45389036184375e-14, 1.53349798900587e-07, 2.24154481625442e-14, 6.8420045185614e-14)	c(TRUE, TRUE, TRUE, TRUE)	9781	c(2848, 1439, 3091, 2618)	c(2048, 1051, 2214, 1891)	GO:BP	biological_process	15065	3543	character(0)	20
63	GO:0009059	c(5.64980118120516e-05, 2.87599894883544e-07, 3.82028759406999e-14, 3.19264557267635e-13)	c(TRUE, TRUE, TRUE, TRUE)	2074	c(2848, 1439, 3091, 2618)	c(494, 287, 581, 503)	GO:BP	macromolecule biosynthetic process	15065	3675	c("GO:0043170", "GO:1901576")	1
64	GO:0048513	c(8.43392767468213e-12, 4.88070276038349e-14, 2.24822011467449e-06, 1.0002181366022e-10)	c(TRUE, TRUE, TRUE, TRUE)	943	c(2848, 1439, 3091, 2618)	c(279, 175, 275, 258)	GO:BP	animal organ development	15065	14880	c("GO:0048731", "GO:0048856")	2
65	GO:0034645	c(5.56358231320392e-05, 3.59864433087058e-07, 5.72476821758765e-14, 3.18738026735617e-13)	c(TRUE, TRUE, TRUE, TRUE)	2069	c(2848, 1439, 3091, 2618)	c(493, 286, 579, 502)	GO:BP	cellular macromolecule biosynthetic process	15065	10031	c("GO:0009059", "GO:0044249", "GO:0044260")	1
66	GO:0032989	c(2.65121047235345e-06, 7.04145460062622e-14, 1, 0.000278820676380069)	c(TRUE, TRUE, FALSE, TRUE)	247	c(2848, 1439, 3091, 2618)	c(90, 72, 76, 80)	GO:BP	cellular component morphogenesis	15065	9203	c("GO:0009653", "GO:0016043", "GO:0048869")	2
67	GO:0051276	c(2.44228692701755e-06, 0.407501831724153, 9.14593749980031e-13, 8.13422690760028e-14)	c(TRUE, FALSE, TRUE, TRUE)	442	c(2848, 1439, 3091, 2618)	c(140, 71, 167, 152)	GO:BP	chromosome organization	15065	15771	GO:0006996	3
68	GO:0048812	c(1.36357522203575e-05, 8.13502461121527e-14, 1, 3.93581786968756e-05)	c(TRUE, TRUE, FALSE, TRUE)	198	c(2848, 1439, 3091, 2618)	c(75, 63, 65, 70)	GO:BP	neuron projection morphogenesis	15065	15148	c("GO:0031175", "GO:0120039")	2
69	GO:0120039	c(1.78853522272998e-05, 1.08236309341851e-13, 1, 5.05386501357928e-05)	c(TRUE, TRUE, FALSE, TRUE)	199	c(2848, 1439, 3091, 2618)	c(75, 63, 65, 70)	GO:BP	plasma membrane bounded cell projection morphogenesis	15065	22822	GO:0048858	2
70	GO:0048858	c(2.33887517504572e-05, 1.43674990072564e-13, 1, 6.47199458077616e-05)	c(TRUE, TRUE, FALSE, TRUE)	200	c(2848, 1439, 3091, 2618)	c(75, 63, 65, 70)	GO:BP	cell projection morphogenesis	15065	15193	c("GO:0000902", "GO:0030030", "GO:0032990")	2
71	GO:0032990	c(1.96005449773687e-05, 3.31506551740159e-13, 1, 5.11748346286493e-05)	c(TRUE, TRUE, FALSE, TRUE)	203	c(2848, 1439, 3091, 2618)	c(76, 63, 66, 71)	GO:BP	cell part morphogenesis	15065	9204	GO:0032989	2
72	GO:0034654	c(0.000819135046531046, 1.43203190018415e-07, 2.72862425940002e-07, 4.07896259669484e-13)	c(TRUE, TRUE, TRUE, TRUE)	1614	c(2848, 1439, 3091, 2618)	c(390, 236, 439, 409)	GO:BP	nucleobase-containing compound biosynthetic process	15065	10036	c("GO:0006139", "GO:0018130", "GO:0019438", "GO:0044271", "GO:1901362")	1
73	GO:0006259	c(3.07156737360822e-06, 1, 1.74503320893413e-12, 6.35862111343733e-06)	c(TRUE, FALSE, TRUE, TRUE)	320	c(2848, 1439, 3091, 2618)	c(109, 34, 131, 102)	GO:BP	DNA metabolic process	15065	2286	c("GO:0044260", "GO:0090304")	1
74	GO:0016071	c(4.53829320861759e-07, 1, 3.57321589049181e-12, 9.43121747059394e-07)	c(TRUE, FALSE, TRUE, TRUE)	319	c(2848, 1439, 3091, 2618)	c(111, 42, 130, 104)	GO:BP	mRNA metabolic process	15065	5688	GO:0016070	1
75	GO:0016569	c(2.8317711018653e-06, 0.0139126549972751, 5.31667963282061e-10, 4.6507073842167e-12)	c(TRUE, TRUE, TRUE, TRUE)	147	c(2848, 1439, 3091, 2618)	c(62, 35, 72, 69)	GO:BP	covalent chromatin modification	15065	5866	c("GO:0006325", "GO:0043412")	1
76	GO:0016570	c(2.8317711018653e-06, 0.0139126549972751, 5.31667963282061e-10, 4.6507073842167e-12)	c(TRUE, TRUE, TRUE, TRUE)	147	c(2848, 1439, 3091, 2618)	c(62, 35, 72, 69)	GO:BP	histone modification	15065	5867	c("GO:0006464", "GO:0016569")	1
77	KEGG:03040	c(4.43411727053978e-08, 1, 4.82941634187369e-12, 3.00298763922335e-09)	c(TRUE, FALSE, TRUE, TRUE)	88	c(2848, 1439, 3091, 2618)	c(42, 9, 50, 42)	KEGG	Spliceosome	15065	213	KEGG:00000
78	GO:0019438	c(0.00435448981039385, 6.37304529650106e-07, 1.15297838217623e-06, 4.86993966298847e-12)	c(TRUE, TRUE, TRUE, TRUE)	1646	c(2848, 1439, 3091, 2618)	c(392, 237, 443, 411)	GO:BP	aromatic compound biosynthetic process	15065	6696	c("GO:0006725", "GO:0044249")	1
79	GO:0030030	c(1.74458968377104e-09, 8.14315275009573e-12, 0.00372694419753611, 2.69069147885828e-10)	c(TRUE, TRUE, TRUE, TRUE)	425	c(2848, 1439, 3091, 2618)	c(145, 97, 133, 139)	GO:BP	cell projection organization	15065	7699	GO:0016043	3
80	GO:0061564	c(3.24332415778987e-05, 1.05020891696901e-11, 1, 0.000126585567723711)	c(TRUE, TRUE, FALSE, TRUE)	183	c(2848, 1439, 3091, 2618)	c(70, 57, 61, 65)	GO:BP	axon development	15065	18307	GO:0031175	2
81	GO:0120036	c(1.25841858882232e-08, 1.09093115216815e-11, 0.0158261878200868, 4.71570053233679e-10)	c(TRUE, TRUE, TRUE, TRUE)	407	c(2848, 1439, 3091, 2618)	c(138, 94, 126, 134)	GO:BP	plasma membrane bounded cell projection organization	15065	22821	GO:0030030	3
82	GO:0018130	c(0.00884574832940345, 2.02461971146754e-06, 1.97433293218348e-06, 1.42958929130146e-11)	c(TRUE, TRUE, TRUE, TRUE)	1656	c(2848, 1439, 3091, 2618)	c(392, 236, 444, 411)	GO:BP	heterocycle biosynthetic process	15065	6036	c("GO:0044249", "GO:0046483")	1
83	GO:1901362	c(0.0134268641348447, 7.17120904640345e-06, 2.87579162682679e-06, 1.52090920801375e-11)	c(TRUE, TRUE, TRUE, TRUE)	1686	c(2848, 1439, 3091, 2618)	c(397, 237, 450, 417)	GO:BP	organic cyclic compound biosynthetic process	15065	24638	c("GO:1901360", "GO:1901576")	1
84	GO:0048667	c(9.63451456121412e-05, 3.11658653933427e-11, 1, 0.000128954534604219)	c(TRUE, TRUE, FALSE, TRUE)	187	c(2848, 1439, 3091, 2618)	c(70, 57, 60, 66)	GO:BP	cell morphogenesis involved in neuron differentiation	15065	15013	c("GO:0000904", "GO:0048666")	2
85	GO:0000904	c(0.00038952754227584, 3.14811551021205e-11, 1, 0.000332461855862186)	c(TRUE, TRUE, FALSE, TRUE)	215	c(2848, 1439, 3091, 2618)	c(76, 62, 65, 72)	GO:BP	cell morphogenesis involved in differentiation	15065	308	c("GO:0000902", "GO:0048468")	2
86	GO:0044249	c(0.0290285442073945, 0.000232922399011252, 4.75366089413983e-11, 1.49531365699399e-06)	c(TRUE, TRUE, TRUE, TRUE)	2453	c(2848, 1439, 3091, 2618)	c(552, 314, 653, 542)	GO:BP	cellular biosynthetic process	15065	12733	c("GO:0009058", "GO:0044237")	1
87	GO:0007409	c(0.00011268050644237, 5.88912209654881e-11, 1, 0.000196983729045405)	c(TRUE, TRUE, FALSE, TRUE)	173	c(2848, 1439, 3091, 2618)	c(66, 54, 57, 62)	GO:BP	axonogenesis	15065	3297	c("GO:0048667", "GO:0048812", "GO:0061564")	2
88	KEGG:03030	c(0.000235587523419163, 0.164364306704904, 6.53728525038885e-11, 1.16228217248125e-06)	c(TRUE, FALSE, TRUE, TRUE)	27	c(2848, 1439, 3091, 2618)	c(16, 8, 23, 18)	KEGG	DNA replication	15065	212	KEGG:00000
89	GO:0006325	c(0.000231503753570338, 0.0183735354602729, 6.63084801197962e-09, 1.41279016508595e-10)	c(TRUE, TRUE, TRUE, TRUE)	294	c(2848, 1439, 3091, 2618)	c(97, 56, 115, 107)	GO:BP	chromatin organization	15065	2343	c("GO:0016043", "GO:0051276")	3
90	GO:0034660	c(1, 1, 1.57750165863872e-10, 1)	c(FALSE, FALSE, TRUE, FALSE)	261	c(2848, 1439, 3091, 2618)	c(68, 6, 109, 54)	GO:BP	ncRNA metabolic process	15065	10040	GO:0016070	1
91	GO:0097485	c(0.000151359565736883, 2.53969609537393e-10, 1, 0.00365898292575868)	c(TRUE, TRUE, FALSE, TRUE)	111	c(2848, 1439, 3091, 2618)	c(48, 41, 37, 43)	GO:BP	neuron projection guidance	15065	21913	c("GO:0006928", "GO:0006935", "GO:0048812")	2
92	GO:1901576	c(0.0514144965261125, 0.0013138067084628, 3.90894788789443e-10, 3.95213776863532e-06)	c(FALSE, TRUE, TRUE, TRUE)	2493	c(2848, 1439, 3091, 2618)	c(558, 314, 657, 547)	GO:BP	organic substance biosynthetic process	15065	24835	c("GO:0009058", "GO:0071704")	1
93	GO:0040011	c(0.171823535916451, 3.95198513260724e-10, 1, 0.11123010771378)	c(FALSE, TRUE, FALSE, FALSE)	376	c(2848, 1439, 3091, 2618)	c(107, 86, 92, 101)	GO:BP	locomotion	15065	11494	GO:0008150	8
94	GO:0009058	c(0.0843982639781122, 0.00167787918863241, 5.22369976141475e-10, 1.36323583551896e-05)	c(FALSE, TRUE, TRUE, TRUE)	2527	c(2848, 1439, 3091, 2618)	c(563, 317, 664, 550)	GO:BP	biosynthetic process	15065	3674	GO:0008152	1
95	GO:0007411	c(0.000352458991936769, 1.0079277209766e-09, 1, 0.0083169545768787)	c(TRUE, TRUE, FALSE, TRUE)	110	c(2848, 1439, 3091, 2618)	c(47, 40, 36, 42)	GO:BP	axon guidance	15065	3298	c("GO:0007409", "GO:0097485")	2
96	KEGG:00970	c(2.17803528763577e-05, 1, 1.14624575498429e-09, 0.427552821351088)	c(TRUE, FALSE, TRUE, FALSE)	29	c(2848, 1439, 3091, 2618)	c(18, 2, 23, 11)	KEGG	Aminoacyl-tRNA biosynthesis	15065	153	KEGG:00000
97	KEGG:03008	c(0.0885666688190066, 1, 1.18946792314739e-09, 1)	c(FALSE, FALSE, TRUE, FALSE)	47	c(2848, 1439, 3091, 2618)	c(18, 2, 31, 13)	KEGG	Ribosome biogenesis in eukaryotes	15065	205	KEGG:00000
98	GO:0007417	c(1.50112926926228e-08, 1.87620636924363e-09, 2.23744166137286e-07, 2.9311372054678e-09)	c(TRUE, TRUE, TRUE, TRUE)	221	c(2848, 1439, 3091, 2618)	c(88, 60, 90, 85)	GO:BP	central nervous system development	15065	3304	c("GO:0007399", "GO:0048731")	2
99	GO:0044271	c(0.00206552501524739, 0.000509857043969319, 2.09375668960416e-09, 4.27481869445814e-08)	c(TRUE, TRUE, TRUE, TRUE)	2000	c(2848, 1439, 3091, 2618)	c(468, 263, 540, 463)	GO:BP	cellular nitrogen compound biosynthetic process	15065	12747	c("GO:0034641", "GO:0044249")	1
100	KEGG:04310	c(2.31016831935869e-05, 7.11921098370555e-07, 5.99378790984732e-07, 2.67583207230133e-09)	c(TRUE, TRUE, TRUE, TRUE)	91	c(2848, 1439, 3091, 2618)	c(38, 28, 43, 43)	KEGG	Wnt signaling pathway	15065	279	KEGG:00000
101	KEGG:03420	c(0.00235201032483431, 1, 5.84745490091334e-09, 0.000744201522360543)	c(TRUE, FALSE, TRUE, TRUE)	37	c(2848, 1439, 3091, 2618)	c(18, 7, 26, 18)	KEGG	Nucleotide excision repair	15065	219	KEGG:00000
102	KEGG:04914	c(0.000169328557989094, 1, 7.67190954233998e-08, 7.37521904076699e-09)	c(TRUE, FALSE, TRUE, TRUE)	50	c(2848, 1439, 3091, 2618)	c(24, 9, 30, 29)	KEGG	Progesterone-mediated oocyte maturation	15065	350	KEGG:00000
103	GO:0045934	c(0.00294622588921223, 0.000785676726880336, 0.00199685099650867, 7.6160957674631e-09)	c(TRUE, TRUE, TRUE, TRUE)	228	c(2848, 1439, 3091, 2618)	c(77, 50, 82, 86)	GO:BP	negative regulation of nucleobase-containing compound metabolic process	15065	13686	c("GO:0006139", "GO:0019219", "GO:0031324", "GO:0051172")	1
104	GO:0042330	c(0.0236823151084959, 8.15935265020341e-09, 1, 0.145232743361969)	c(TRUE, TRUE, FALSE, FALSE)	153	c(2848, 1439, 3091, 2618)	c(55, 47, 41, 50)	GO:BP	taxis	15065	11707	c("GO:0009605", "GO:0040011")	6
105	GO:0006281	c(0.000293591510568851, 1, 1.53851078461344e-08, 0.00115041325485723)	c(TRUE, FALSE, TRUE, TRUE)	229	c(2848, 1439, 3091, 2618)	c(80, 23, 95, 74)	GO:BP	DNA repair	15065	2306	c("GO:0006259", "GO:0006974")	1
106	GO:0006366	c(1, 0.00016046577993022, 0.239151324726358, 3.29678193148249e-08)	c(FALSE, TRUE, FALSE, TRUE)	936	c(2848, 1439, 3091, 2618)	c(221, 144, 247, 247)	GO:BP	transcription by RNA polymerase II	15065	2375	GO:0006351	1
107	GO:0006928	c(0.0125000879776783, 3.45282549742173e-08, 1, 0.000875134112883808)	c(TRUE, TRUE, FALSE, TRUE)	468	c(2848, 1439, 3091, 2618)	c(133, 95, 122, 129)	GO:BP	movement of cell or subcellular component	15065	2879	GO:0009987	18
108	GO:0008380	c(0.00066864519503555, 1, 3.54052758072719e-08, 0.000156134018201135)	c(TRUE, FALSE, TRUE, TRUE)	176	c(2848, 1439, 3091, 2618)	c(65, 20, 78, 63)	GO:BP	RNA splicing	15065	3621	GO:0006396	1
109	KEGG:03022	c(0.00027396663351037, 1, 4.50172854395961e-08, 8.50977248184934e-05)	c(TRUE, FALSE, TRUE, TRUE)	30	c(2848, 1439, 3091, 2618)	c(17, 4, 22, 17)	KEGG	Basal transcription factors	15065	211	KEGG:00000
110	KEGG:03440	c(1.00396936094945e-05, 1, 5.55897232095482e-08, 0.000907240760623278)	c(TRUE, FALSE, TRUE, TRUE)	28	c(2848, 1439, 3091, 2618)	c(18, 4, 21, 15)	KEGG	Homologous recombination	15065	221	KEGG:00000
111	KEGG:03460	c(0.0117873987609094, 1, 5.55897232095482e-08, 0.313886480733246)	c(TRUE, FALSE, TRUE, FALSE)	28	c(2848, 1439, 3091, 2618)	c(14, 3, 21, 11)	KEGG	Fanconi anemia pathway	15065	223	KEGG:00000
112	GO:0048522	c(0.0224818443011743, 3.35385258881576e-06, 1, 5.58457861679829e-08)	c(TRUE, TRUE, FALSE, TRUE)	870	c(2848, 1439, 3091, 2618)	c(222, 142, 226, 232)	GO:BP	positive regulation of cellular process	15065	14889	c("GO:0009987", "GO:0048518", "GO:0050794")	1
113	GO:0048519	c(1.89541176454937e-06, 0.000769672470381046, 0.00229474559571247, 6.02175606380673e-08)	c(TRUE, TRUE, TRUE, TRUE)	908	c(2848, 1439, 3091, 2618)	c(250, 138, 252, 240)	GO:BP	negative regulation of biological process	15065	14886	c("GO:0008150", "GO:0050789")	1
114	GO:0006935	c(0.128005141552352, 7.78684304173006e-08, 1, 0.364763728955169)	c(FALSE, TRUE, FALSE, FALSE)	145	c(2848, 1439, 3091, 2618)	c(51, 44, 38, 47)	GO:BP	chemotaxis	15065	2886	c("GO:0042221", "GO:0042330")	5
115	KEGG:04114	c(3.85038933164447e-05, 1, 9.85514259509645e-08, 3.25288540595002e-05)	c(TRUE, FALSE, TRUE, TRUE)	53	c(2848, 1439, 3091, 2618)	c(26, 10, 31, 25)	KEGG	Oocyte meiosis	15065	249	KEGG:00000
116	GO:0050793	c(0.206964551255732, 1.11653828709982e-07, 1, 0.0762606803049771)	c(FALSE, TRUE, FALSE, FALSE)	305	c(2848, 1439, 3091, 2618)	c(90, 70, 83, 86)	GO:BP	regulation of developmental process	15065	15370	c("GO:0032502", "GO:0050789")	2
117	GO:0006397	c(0.000419084036032194, 1, 1.20272830982499e-07, 0.000531909148196622)	c(TRUE, FALSE, TRUE, TRUE)	246	c(2848, 1439, 3091, 2618)	c(84, 27, 98, 79)	GO:BP	mRNA processing	15065	2401	c("GO:0006396", "GO:0016071")	1
118	GO:2000113	c(0.0404574063089045, 5.60482544117901e-05, 0.0130171900827442, 1.40508557668097e-07)	c(TRUE, TRUE, TRUE, TRUE)	278	c(2848, 1439, 3091, 2618)	c(86, 60, 93, 96)	GO:BP	negative regulation of cellular macromolecule biosynthetic process	15065	29315	c("GO:0010558", "GO:0031327", "GO:0034645", "GO:2000112")	1
119	GO:0010558	c(0.0404574063089045, 5.60482544117901e-05, 0.0130171900827442, 1.40508557668097e-07)	c(TRUE, TRUE, TRUE, TRUE)	278	c(2848, 1439, 3091, 2618)	c(86, 60, 93, 96)	GO:BP	negative regulation of macromolecule biosynthetic process	15065	4722	c("GO:0009059", "GO:0009890", "GO:0010556", "GO:0010605")	1
120	KEGG:04261	c(1.45600095017428e-07, 0.0120734800288809, 0.00879072064593656, 0.013668130446516)	c(TRUE, TRUE, TRUE, TRUE)	63	c(2848, 1439, 3091, 2618)	c(33, 16, 26, 23)	KEGG	Adrenergic signaling in cardiomyocytes	15065	277	KEGG:00000
121	GO:0010604	c(0.389762046274751, 0.00114048102992477, 0.261510923931414, 1.54399077141617e-07)	c(FALSE, TRUE, FALSE, TRUE)	501	c(2848, 1439, 3091, 2618)	c(134, 87, 144, 149)	GO:BP	positive regulation of macromolecule metabolic process	15065	4763	c("GO:0009893", "GO:0043170", "GO:0060255")	1
122	GO:0045935	c(1, 0.000230414378023096, 0.0766227568537571, 1.58194491036815e-07)	c(FALSE, TRUE, FALSE, TRUE)	323	c(2848, 1439, 3091, 2618)	c(90, 65, 102, 107)	GO:BP	positive regulation of nucleobase-containing compound metabolic process	15065	13687	c("GO:0006139", "GO:0019219", "GO:0031325", "GO:0051173")	1
123	GO:0051253	c(0.017116030153723, 0.000400263660984664, 0.021134645952827, 2.14049290231835e-07)	c(TRUE, TRUE, TRUE, TRUE)	217	c(2848, 1439, 3091, 2618)	c(72, 49, 76, 80)	GO:BP	negative regulation of RNA metabolic process	15065	15754	c("GO:0010605", "GO:0016070", "GO:0045934", "GO:0051252")	1
124	GO:0048523	c(0.000143846709855379, 0.00105968941042494, 0.179524371567705, 2.4566019247806e-07)	c(TRUE, TRUE, FALSE, TRUE)	821	c(2848, 1439, 3091, 2618)	c(222, 127, 221, 219)	GO:BP	negative regulation of cellular process	15065	14890	c("GO:0009987", "GO:0048519", "GO:0050794")	1
125	GO:0048518	c(0.116230815271875, 5.8146365626518e-06, 1, 2.66329683023745e-07)	c(FALSE, TRUE, FALSE, TRUE)	958	c(2848, 1439, 3091, 2618)	c(237, 152, 240, 248)	GO:BP	positive regulation of biological process	15065	14885	c("GO:0008150", "GO:0050789")	1
126	GO:0006974	c(0.000265610298356518, 1, 4.41004109206025e-07, 0.0051398502669144)	c(TRUE, FALSE, TRUE, TRUE)	275	c(2848, 1439, 3091, 2618)	c(92, 26, 105, 83)	GO:BP	cellular response to DNA damage stimulus	15065	2917	GO:0033554	9
127	GO:0031327	c(0.17185512548221, 0.000203045916841061, 0.016848858788402, 4.49704897374857e-07)	c(FALSE, TRUE, TRUE, TRUE)	287	c(2848, 1439, 3091, 2618)	c(86, 60, 95, 97)	GO:BP	negative regulation of cellular biosynthetic process	15065	8285	c("GO:0009890", "GO:0031324", "GO:0031326", "GO:0044249")	1
128	KEGG:04916	c(0.0114499901076827, 0.00309217077684865, 0.000324104189788966, 4.97386902248846e-07)	c(TRUE, TRUE, TRUE, TRUE)	51	c(2848, 1439, 3091, 2618)	c(21, 15, 25, 27)	KEGG	Melanogenesis	15065	352	KEGG:00000
129	GO:0009890	c(0.20030100544849, 0.000233170609704927, 0.0201495882900006, 5.64355047309777e-07)	c(FALSE, TRUE, TRUE, TRUE)	288	c(2848, 1439, 3091, 2618)	c(86, 60, 95, 97)	GO:BP	negative regulation of biosynthetic process	15065	4223	c("GO:0009058", "GO:0009889", "GO:0009892")	1
130	KEGG:04144	c(0.0150331381757452, 5.73661075992904e-07, 0.0930715383988722, 6.05166722811948e-05)	c(TRUE, TRUE, FALSE, TRUE)	136	c(2848, 1439, 3091, 2618)	c(43, 36, 43, 47)	KEGG	Endocytosis	15065	261	KEGG:00000
131	GO:0009887	c(7.9289489816238e-05, 7.27879554040893e-07, 0.0833201029913222, 0.000720934807048754)	c(TRUE, TRUE, FALSE, TRUE)	277	c(2848, 1439, 3091, 2618)	c(94, 64, 90, 86)	GO:BP	animal organ morphogenesis	15065	4220	c("GO:0009653", "GO:0048513")	2
132	GO:0022402	c(5.78727317633236e-05, 1, 7.97450128413676e-07, 6.30868298940911e-06)	c(TRUE, FALSE, TRUE, TRUE)	295	c(2848, 1439, 3091, 2618)	c(99, 35, 110, 96)	GO:BP	cell cycle process	15065	7600	c("GO:0007049", "GO:0009987")	4
133	GO:0006357	c(1, 0.000104003086732194, 1, 8.69069014215494e-07)	c(FALSE, TRUE, FALSE, TRUE)	897	c(2848, 1439, 3091, 2618)	c(207, 140, 232, 233)	GO:BP	regulation of transcription by RNA polymerase II	15065	2368	c("GO:0006355", "GO:0006366")	1
134	KEGG:03430	c(0.0569947146053774, 1, 1.1300031247477e-06, 0.0311790992576908)	c(FALSE, FALSE, TRUE, TRUE)	16	c(2848, 1439, 3091, 2618)	c(9, 4, 14, 9)	KEGG	Mismatch repair	15065	220	KEGG:00000
135	GO:1903507	c(0.0658640365355749, 0.000518078441869064, 0.0735351909603818, 1.26051130388665e-06)	c(FALSE, TRUE, FALSE, TRUE)	212	c(2848, 1439, 3091, 2618)	c(69, 48, 73, 77)	GO:BP	negative regulation of nucleic acid-templated transcription	15065	26536	c("GO:0097659", "GO:1902679", "GO:1903506")	1
136	GO:1902679	c(0.0658640365355749, 0.000518078441869064, 0.0735351909603818, 1.26051130388665e-06)	c(FALSE, TRUE, FALSE, TRUE)	212	c(2848, 1439, 3091, 2618)	c(69, 48, 73, 77)	GO:BP	negative regulation of RNA biosynthetic process	15065	25802	c("GO:0010558", "GO:0031327", "GO:0032774", "GO:0051253", "GO:2001141")	1
137	GO:0045892	c(0.0658640365355749, 0.000518078441869064, 0.0735351909603818, 1.26051130388665e-06)	c(FALSE, TRUE, FALSE, TRUE)	212	c(2848, 1439, 3091, 2618)	c(69, 48, 73, 77)	GO:BP	negative regulation of transcription, DNA-templated	15065	13646	c("GO:0006351", "GO:0006355", "GO:1903507", "GO:2000113")	1
138	GO:0060322	c(0.000130713868775056, 0.00107626801494313, 0.00117108050167387, 1.29950518024023e-06)	c(TRUE, TRUE, TRUE, TRUE)	152	c(2848, 1439, 3091, 2618)	c(60, 38, 61, 61)	GO:BP	head development	15065	17147	GO:0048856	2
139	GO:0006399	c(1, 1, 1.31774709076363e-06, 1)	c(FALSE, FALSE, TRUE, FALSE)	132	c(2848, 1439, 3091, 2618)	c(39, 4, 61, 27)	GO:BP	tRNA metabolic process	15065	2403	GO:0034660	1
140	GO:0009893	c(1, 0.000814713044366033, 0.777215741561508, 2.16526002412579e-06)	c(FALSE, TRUE, FALSE, TRUE)	544	c(2848, 1439, 3091, 2618)	c(141, 93, 152, 155)	GO:BP	positive regulation of metabolic process	15065	4226	c("GO:0008152", "GO:0019222", "GO:0048518")	1
141	GO:0034470	c(1, 1, 2.4263114308358e-06, 1)	c(FALSE, FALSE, TRUE, FALSE)	219	c(2848, 1439, 3091, 2618)	c(50, 4, 87, 42)	GO:BP	ncRNA processing	15065	9964	c("GO:0006396", "GO:0034660")	1
142	GO:0010605	c(0.000260445529523611, 0.00793467431903989, 0.000525999691453485, 2.62035053470112e-06)	c(TRUE, TRUE, TRUE, TRUE)	483	c(2848, 1439, 3091, 2618)	c(143, 82, 151, 141)	GO:BP	negative regulation of macromolecule metabolic process	15065	4764	c("GO:0009892", "GO:0043170", "GO:0060255")	1
143	KEGG:04010	c(2.71265257255749e-06, 9.27318383505444e-06, 0.000634270132085525, 3.22563084991645e-06)	c(TRUE, TRUE, TRUE, TRUE)	144	c(2848, 1439, 3091, 2618)	c(55, 35, 52, 52)	KEGG	MAPK signaling pathway	15065	224	KEGG:00000
144	KEGG:04012	c(0.169836618385423, 5.95785753692506e-06, 0.156158391513154, 2.7626958452586e-06)	c(FALSE, TRUE, FALSE, TRUE)	42	c(2848, 1439, 3091, 2618)	c(16, 17, 17, 23)	KEGG	ErbB signaling pathway	15065	226	KEGG:00000
145	GO:0007017	c(0.0469397067041566, 1, 0.0162517428337369, 2.80689242405037e-06)	c(TRUE, FALSE, TRUE, TRUE)	283	c(2848, 1439, 3091, 2618)	c(87, 41, 94, 94)	GO:BP	microtubule-based process	15065	2951	GO:0009987	17
146	GO:0009888	c(0.00013594923463703, 3.10682286628441e-06, 1, 0.000517596260940131)	c(TRUE, TRUE, FALSE, TRUE)	542	c(2848, 1439, 3091, 2618)	c(158, 100, 146, 146)	GO:BP	tissue development	15065	4221	GO:0048856	2
147	GO:0009892	c(0.000748437728490043, 0.0447170089196147, 0.000302464519282005, 3.76938646551224e-06)	c(TRUE, TRUE, TRUE, TRUE)	503	c(2848, 1439, 3091, 2618)	c(146, 82, 157, 145)	GO:BP	negative regulation of metabolic process	15065	4225	c("GO:0008152", "GO:0019222", "GO:0048519")	1
148	GO:0051254	c(1, 0.000234783317382887, 0.682202806715378, 4.83520170729207e-06)	c(FALSE, TRUE, FALSE, TRUE)	302	c(2848, 1439, 3091, 2618)	c(80, 62, 93, 98)	GO:BP	positive regulation of RNA metabolic process	15065	15755	c("GO:0010604", "GO:0016070", "GO:0045935", "GO:0051252")	1
149	GO:0006260	c(1, 1, 5.556689526092e-06, 0.0422123246316811)	c(FALSE, FALSE, TRUE, TRUE)	93	c(2848, 1439, 3091, 2618)	c(33, 12, 47, 36)	GO:BP	DNA replication	15065	2287	GO:0034645	1
150	KEGG:04340	c(0.000144113101119873, 1, 0.00049221710590315, 6.01241768623849e-06)	c(TRUE, FALSE, TRUE, TRUE)	29	c(2848, 1439, 3091, 2618)	c(17, 6, 17, 18)	KEGG	Hedgehog signaling pathway	15065	282	KEGG:00000
151	GO:0051173	c(1, 0.00205517010244209, 1, 6.22415302053935e-06)	c(FALSE, TRUE, FALSE, TRUE)	484	c(2848, 1439, 3091, 2618)	c(126, 84, 137, 140)	GO:BP	positive regulation of nitrogen compound metabolic process	15065	15688	c("GO:0006807", "GO:0009893", "GO:0051171")	1
152	GO:0000375	c(0.0194154356117873, 1, 6.86140473302579e-06, 0.0107704631855527)	c(TRUE, FALSE, TRUE, TRUE)	130	c(2848, 1439, 3091, 2618)	c(49, 14, 59, 47)	GO:BP	RNA splicing, via transesterification reactions	15065	154	GO:0008380	1
153	GO:0000398	c(0.0194154356117873, 1, 6.86140473302579e-06, 0.0107704631855527)	c(TRUE, FALSE, TRUE, TRUE)	130	c(2848, 1439, 3091, 2618)	c(49, 14, 59, 47)	GO:BP	mRNA splicing, via spliceosome	15065	168	c("GO:0000377", "GO:0006397")	1
154	GO:0000377	c(0.0194154356117873, 1, 6.86140473302579e-06, 0.0107704631855527)	c(TRUE, FALSE, TRUE, TRUE)	130	c(2848, 1439, 3091, 2618)	c(49, 14, 59, 47)	GO:BP	RNA splicing, via transesterification reactions with bulged adenosine as nucleophile	15065	156	GO:0000375	1
155	GO:0007420	c(0.00109502053458888, 0.00974007080539374, 0.00774551713955375, 1.49917269233864e-05)	c(TRUE, TRUE, TRUE, TRUE)	145	c(2848, 1439, 3091, 2618)	c(56, 35, 57, 57)	GO:BP	brain development	15065	3307	c("GO:0007417", "GO:0048513", "GO:0060322")	2
156	GO:0007049	c(0.103326915778009, 1, 2.0329443732061e-05, 0.0095150638065992)	c(FALSE, FALSE, TRUE, TRUE)	463	c(2848, 1439, 3091, 2618)	c(128, 50, 151, 124)	GO:BP	cell cycle	15065	2976	GO:0009987	4
157	GO:0036211	c(0.355255125610013, 1, 0.0569118610745248, 2.30535238505321e-05)	c(FALSE, FALSE, FALSE, TRUE)	1660	c(2848, 1439, 3091, 2618)	c(381, 203, 416, 381)	GO:BP	protein modification process	15065	10969	c("GO:0019538", "GO:0043412")	1
158	GO:0006464	c(0.355255125610013, 1, 0.0569118610745248, 2.30535238505321e-05)	c(FALSE, FALSE, FALSE, TRUE)	1660	c(2848, 1439, 3091, 2618)	c(381, 203, 416, 381)	GO:BP	cellular protein modification process	15065	2456	c("GO:0036211", "GO:0044267")	1
159	GO:0043412	c(0.0291041485870963, 1, 9.25522073206362e-05, 2.9383257155992e-05)	c(TRUE, FALSE, TRUE, TRUE)	1765	c(2848, 1439, 3091, 2618)	c(411, 210, 459, 401)	GO:BP	macromolecule modification	15065	12341	GO:0043170	1
160	KEGG:00310	c(0.327521316821084, 3.28429980230004e-05, 8.70382835099181e-05, 0.0473310254751455)	c(FALSE, TRUE, TRUE, TRUE)	37	c(2848, 1439, 3091, 2618)	c(14, 15, 21, 15)	KEGG	Lysine degradation	15065	36	KEGG:00000
161	KEGG:04068	c(0.0979955361347368, 0.00116320744566798, 0.0613185382603267, 3.33213952484732e-05)	c(FALSE, TRUE, FALSE, TRUE)	70	c(2848, 1439, 3091, 2618)	c(24, 19, 26, 30)	KEGG	FoxO signaling pathway	15065	239	KEGG:00000
162	GO:0007166	c(1, 3.66436329744007e-05, 1, 1)	c(FALSE, TRUE, FALSE, FALSE)	612	c(2848, 1439, 3091, 2618)	c(139, 106, 131, 142)	GO:BP	cell surface receptor signaling pathway	15065	3079	GO:0007165	11
163	KEGG:04120	c(0.00633807832251244, 0.0812281542299867, 0.000492801396525812, 3.97837921679705e-05)	c(TRUE, FALSE, TRUE, TRUE)	74	c(2848, 1439, 3091, 2618)	c(28, 16, 32, 31)	KEGG	Ubiquitin mediated proteolysis	15065	251	KEGG:00000
164	KEGG:04910	c(0.148256909513647, 0.000739252540826889, 0.926235280131706, 5.81042088273722e-05)	c(FALSE, TRUE, FALSE, TRUE)	68	c(2848, 1439, 3091, 2618)	c(23, 19, 22, 29)	KEGG	Insulin signaling pathway	15065	346	KEGG:00000
165	GO:0010557	c(1, 0.117099370290047, 1, 5.94107506649738e-05)	c(FALSE, FALSE, FALSE, TRUE)	281	c(2848, 1439, 3091, 2618)	c(75, 52, 87, 90)	GO:BP	positive regulation of macromolecule biosynthetic process	15065	4721	c("GO:0009059", "GO:0009891", "GO:0010556", "GO:0010604")	1
166	GO:2000026	c(0.0284468652504141, 6.08361624327212e-05, 1, 0.0758363005342434)	c(TRUE, TRUE, FALSE, FALSE)	150	c(2848, 1439, 3091, 2618)	c(54, 40, 48, 50)	GO:BP	regulation of multicellular organismal development	15065	29229	c("GO:0007275", "GO:0050793", "GO:0051239")	2
167	KEGG:01212	c(6.48579633025041e-05, 1, 0.00121325616192109, 1)	c(TRUE, FALSE, TRUE, FALSE)	39	c(2848, 1439, 3091, 2618)	c(21, 6, 20, 10)	KEGG	Fatty acid metabolism	15065	186	KEGG:00000
168	GO:0009891	c(1, 0.0898273512736889, 1, 7.00098659256862e-05)	c(FALSE, FALSE, FALSE, TRUE)	286	c(2848, 1439, 3091, 2618)	c(76, 53, 88, 91)	GO:BP	positive regulation of biosynthetic process	15065	4224	c("GO:0009058", "GO:0009889", "GO:0009893")	1
169	GO:0031328	c(1, 0.0898273512736889, 1, 7.00098659256862e-05)	c(FALSE, FALSE, FALSE, TRUE)	286	c(2848, 1439, 3091, 2618)	c(76, 53, 88, 91)	GO:BP	positive regulation of cellular biosynthetic process	15065	8286	c("GO:0009891", "GO:0031325", "GO:0031326", "GO:0044249")	1
170	GO:0031325	c(1, 0.00593438530995466, 1, 7.92702059643857e-05)	c(FALSE, TRUE, FALSE, TRUE)	519	c(2848, 1439, 3091, 2618)	c(132, 87, 143, 144)	GO:BP	positive regulation of cellular metabolic process	15065	8283	c("GO:0009893", "GO:0031323", "GO:0044237", "GO:0048522")	1
171	GO:0043010	c(0.00339307312281649, 0.0241392544290843, 0.000100317564891282, 0.0378934960777046)	c(TRUE, TRUE, TRUE, TRUE)	131	c(2848, 1439, 3091, 2618)	c(51, 32, 57, 46)	GO:BP	camera-type eye development	15065	12128	GO:0001654	2
172	KEGG:00062	c(0.000103204565777997, 1, 0.00260744239323291, 1)	c(TRUE, FALSE, TRUE, FALSE)	16	c(2848, 1439, 3091, 2618)	c(12, 1, 11, 3)	KEGG	Fatty acid elongation	15065	10	KEGG:00000
173	GO:1903047	c(0.0732651471760885, 1, 0.00010359544569312, 0.0014164318537409)	c(FALSE, FALSE, TRUE, TRUE)	181	c(2848, 1439, 3091, 2618)	c(61, 22, 72, 62)	GO:BP	mitotic cell cycle process	15065	26133	c("GO:0000278", "GO:0022402")	4
174	GO:0051172	c(0.0808831233762158, 0.00511785780686693, 0.333131188742338, 0.000106649292536117)	c(FALSE, TRUE, FALSE, TRUE)	409	c(2848, 1439, 3091, 2618)	c(116, 73, 121, 119)	GO:BP	negative regulation of nitrogen compound metabolic process	15065	15687	c("GO:0006807", "GO:0009892", "GO:0051171")	1
175	KEGG:03410	c(0.00203637157230449, 1, 0.000113604419008904, 0.000825657196084921)	c(TRUE, FALSE, TRUE, TRUE)	22	c(2848, 1439, 3091, 2618)	c(13, 5, 15, 13)	KEGG	Base excision repair	15065	218	KEGG:00000
176	KEGG:04218	c(0.000157122705023479, 0.0405626858093679, 0.00012503172031746, 0.000232035152737213)	c(TRUE, TRUE, TRUE, TRUE)	83	c(2848, 1439, 3091, 2618)	c(34, 18, 36, 32)	KEGG	Cellular senescence	15065	275	KEGG:00000
177	GO:1903508	c(1, 0.0162297892538358, 1, 0.000129017595779223)	c(FALSE, TRUE, FALSE, TRUE)	264	c(2848, 1439, 3091, 2618)	c(69, 52, 80, 85)	GO:BP	positive regulation of nucleic acid-templated transcription	15065	26537	c("GO:0097659", "GO:1902680", "GO:1903506")	1
178	GO:1902680	c(1, 0.0162297892538358, 1, 0.000129017595779223)	c(FALSE, TRUE, FALSE, TRUE)	264	c(2848, 1439, 3091, 2618)	c(69, 52, 80, 85)	GO:BP	positive regulation of RNA biosynthetic process	15065	25803	c("GO:0010557", "GO:0031328", "GO:0032774", "GO:0051254", "GO:2001141")	1
179	GO:0045893	c(1, 0.0162297892538358, 1, 0.000129017595779223)	c(FALSE, TRUE, FALSE, TRUE)	264	c(2848, 1439, 3091, 2618)	c(69, 52, 80, 85)	GO:BP	positive regulation of transcription, DNA-templated	15065	13647	c("GO:0006351", "GO:0006355", "GO:1903508")	1
180	GO:0048646	c(0.000130224879958513, 0.00015642133726706, 1, 0.22533550788222)	c(TRUE, TRUE, FALSE, FALSE)	299	c(2848, 1439, 3091, 2618)	c(99, 62, 91, 83)	GO:BP	anatomical structure formation involved in morphogenesis	15065	14992	c("GO:0009653", "GO:0032502")	2
181	GO:0072359	c(0.00530508143020268, 0.000147883203857924, 1, 1)	c(TRUE, TRUE, FALSE, FALSE)	348	c(2848, 1439, 3091, 2618)	c(106, 69, 98, 90)	GO:BP	circulatory system development	15065	20273	GO:0048731	2
182	GO:0043009	c(0.00216122627057153, 1, 0.0105540627722313, 0.000167308762342757)	c(TRUE, FALSE, TRUE, TRUE)	192	c(2848, 1439, 3091, 2618)	c(68, 37, 70, 67)	GO:BP	chordate embryonic development	15065	12127	GO:0009792	2
183	GO:0009792	c(0.00216122627057153, 1, 0.0105540627722313, 0.000167308762342757)	c(TRUE, FALSE, TRUE, TRUE)	192	c(2848, 1439, 3091, 2618)	c(68, 37, 70, 67)	GO:BP	embryo development ending in birth or egg hatching	15065	4147	GO:0009790	2
184	GO:0031324	c(0.304502429901819, 0.0711051864969216, 0.3150787537337, 0.000260215210295827)	c(FALSE, FALSE, FALSE, TRUE)	437	c(2848, 1439, 3091, 2618)	c(120, 73, 128, 124)	GO:BP	negative regulation of cellular metabolic process	15065	8282	c("GO:0009892", "GO:0031323", "GO:0044237", "GO:0048523")	1
185	GO:0048880	c(0.0438013272239948, 0.000293326895413242, 0.00382784375618073, 0.00407488750616052)	c(TRUE, TRUE, TRUE, TRUE)	202	c(2848, 1439, 3091, 2618)	c(67, 47, 74, 66)	GO:BP	sensory system development	15065	15213	GO:0048731	2
186	GO:1903311	c(0.00181217087888052, 0.115566215273586, 0.000312580295651303, 0.000742521862871746)	c(TRUE, FALSE, TRUE, TRUE)	78	c(2848, 1439, 3091, 2618)	c(36, 22, 39, 35)	GO:BP	regulation of mRNA metabolic process	15065	26352	c("GO:0016071", "GO:0051252")	1
187	GO:0035295	c(0.000325595643781356, 0.000785396251579235, 1, 0.764048277820142)	c(TRUE, TRUE, FALSE, FALSE)	276	c(2848, 1439, 3091, 2618)	c(92, 57, 83, 76)	GO:BP	tube development	15065	10319	c("GO:0007275", "GO:0048856")	2
188	GO:0044265	c(0.580658766416204, 1, 0.151028251619343, 0.000335826433530662)	c(FALSE, FALSE, FALSE, TRUE)	403	c(2848, 1439, 3091, 2618)	c(111, 49, 121, 116)	GO:BP	cellular macromolecule catabolic process	15065	12743	c("GO:0009057", "GO:0044248", "GO:0044260")	1
189	KEGG:03018	c(0.0937649897270277, 0.661689805782987, 0.000466323942564147, 0.0108470061111716)	c(FALSE, FALSE, TRUE, TRUE)	40	c(2848, 1439, 3091, 2618)	c(16, 9, 21, 17)	KEGG	RNA degradation	15065	209	KEGG:00000
190	KEGG:04330	c(0.00147306810846014, 0.000529796431487742, 0.000918787813046632, 0.000505862242451704)	c(TRUE, TRUE, TRUE, TRUE)	30	c(2848, 1439, 3091, 2618)	c(16, 12, 17, 16)	KEGG	Notch signaling pathway	15065	281	KEGG:00000
191	KEGG:04810	c(0.459870974845436, 0.000540505087665283, 1, 0.0639035254028516)	c(FALSE, TRUE, FALSE, FALSE)	103	c(2848, 1439, 3091, 2618)	c(30, 25, 30, 31)	KEGG	Regulation of actin cytoskeleton	15065	345	KEGG:00000
192	KEGG:04371	c(0.582655060291635, 0.911791526999474, 1, 0.00055696896117615)	c(FALSE, FALSE, FALSE, TRUE)	71	c(2848, 1439, 3091, 2618)	c(22, 13, 20, 28)	KEGG	Apelin signaling pathway	15065	288	KEGG:00000
193	GO:0044267	c(0.099522304675602, 1, 0.000809099646548825, 0.0055907669265828)	c(FALSE, FALSE, TRUE, TRUE)	2175	c(2848, 1439, 3091, 2618)	c(491, 242, 545, 465)	GO:BP	cellular protein metabolic process	15065	12744	c("GO:0019538", "GO:0044260")	1
194	GO:0000226	c(1, 1, 0.786210810384344, 0.0008835845278227)	c(FALSE, FALSE, FALSE, TRUE)	183	c(2848, 1439, 3091, 2618)	c(57, 27, 62, 63)	GO:BP	microtubule cytoskeleton organization	15065	103	c("GO:0007010", "GO:0007017")	3
195	GO:0033554	c(0.0177512028159026, 1, 0.000940017459766595, 0.0416520802553625)	c(TRUE, FALSE, TRUE, TRUE)	475	c(2848, 1439, 3091, 2618)	c(134, 49, 148, 124)	GO:BP	cellular response to stress	15065	9546	c("GO:0006950", "GO:0051716")	10
196	GO:0007010	c(0.135175975729851, 0.110446809516614, 1, 0.00106708000062394)	c(FALSE, FALSE, FALSE, TRUE)	474	c(2848, 1439, 3091, 2618)	c(130, 77, 121, 130)	GO:BP	cytoskeleton organization	15065	2946	GO:0006996	3
197	KEGG:05132	c(0.00404035537978098, 0.00318664259497419, 0.0075120741951215, 0.00109425391414373)	c(TRUE, TRUE, TRUE, TRUE)	141	c(2848, 1439, 3091, 2618)	c(46, 29, 48, 45)	KEGG	Salmonella infection	15065	407	KEGG:00000
198	GO:0009790	c(0.00234132517316257, 0.294996777932559, 0.0436032591262613, 0.00150830711371748)	c(TRUE, FALSE, TRUE, TRUE)	422	c(2848, 1439, 3091, 2618)	c(125, 69, 128, 118)	GO:BP	embryo development	15065	4145	GO:0007275	2
199	KEGG:04141	c(0.018000685876057, 1, 0.00157810363024148, 0.00333811425628127)	c(TRUE, FALSE, TRUE, TRUE)	105	c(2848, 1439, 3091, 2618)	c(35, 17, 40, 35)	KEGG	Protein processing in endoplasmic reticulum	15065	259	KEGG:00000
200	GO:0022613	c(1, 1, 0.00158730446593364, 1)	c(FALSE, FALSE, TRUE, FALSE)	209	c(2848, 1439, 3091, 2618)	c(55, 4, 77, 41)	GO:BP	ribonucleoprotein complex biogenesis	15065	7628	GO:0044085	3
201	KEGG:04540	c(1, 0.0106249211559982, 0.176157765373674, 0.00184480767405859)	c(FALSE, TRUE, FALSE, TRUE)	39	c(2848, 1439, 3091, 2618)	c(12, 12, 16, 18)	KEGG	Gap junction	15065	298	KEGG:00000
202	KEGG:04912	c(0.474284716017484, 0.0563888136180209, 0.466294161559933, 0.0019909269500521)	c(FALSE, FALSE, FALSE, TRUE)	46	c(2848, 1439, 3091, 2618)	c(16, 12, 17, 20)	KEGG	GnRH signaling pathway	15065	348	KEGG:00000
203	KEGG:04150	c(1, 0.109449895839291, 1, 0.00201238151600987)	c(FALSE, FALSE, FALSE, TRUE)	83	c(2848, 1439, 3091, 2618)	c(21, 17, 22, 30)	KEGG	mTOR signaling pathway	15065	264	KEGG:00000
204	GO:0007423	c(0.0548146202300746, 0.00280645628313595, 0.0708850963515971, 0.0217066619663489)	c(FALSE, TRUE, FALSE, TRUE)	223	c(2848, 1439, 3091, 2618)	c(72, 48, 76, 69)	GO:BP	sensory organ development	15065	3310	GO:0048513	2
205	GO:0060041	c(0.00898051245670864, 0.064691389624274, 0.00317152835616592, 0.0815406252813363)	c(TRUE, FALSE, TRUE, FALSE)	99	c(2848, 1439, 3091, 2618)	c(41, 26, 44, 37)	GO:BP	retina development in camera-type eye	15065	16908	c("GO:0043010", "GO:0048856")	2
206	GO:0009057	c(1, 1, 0.250734427041351, 0.00330197004434466)	c(FALSE, FALSE, FALSE, TRUE)	423	c(2848, 1439, 3091, 2618)	c(114, 52, 125, 117)	GO:BP	macromolecule catabolic process	15065	3673	c("GO:0043170", "GO:1901575")	1
207	GO:0045944	c(1, 0.486867254235297, 1, 0.00460070373441406)	c(FALSE, FALSE, FALSE, TRUE)	170	c(2848, 1439, 3091, 2618)	c(49, 35, 55, 58)	GO:BP	positive regulation of transcription by RNA polymerase II	15065	13695	c("GO:0006357", "GO:0006366", "GO:0045893")	1
208	GO:0048589	c(1, 0.00464986435456589, 1, 1)	c(FALSE, TRUE, FALSE, FALSE)	141	c(2848, 1439, 3091, 2618)	c(35, 35, 33, 38)	GO:BP	developmental growth	15065	14946	c("GO:0032502", "GO:0040007")	2
209	GO:0051239	c(1, 0.00580803715549216, 1, 1)	c(FALSE, TRUE, FALSE, FALSE)	263	c(2848, 1439, 3091, 2618)	c(73, 53, 64, 64)	GO:BP	regulation of multicellular organismal process	15065	15743	c("GO:0032501", "GO:0050789")	13
210	GO:0042221	c(1, 0.00668202219054485, 1, 1)	c(FALSE, TRUE, FALSE, FALSE)	584	c(2848, 1439, 3091, 2618)	c(121, 95, 111, 118)	GO:BP	response to chemical	15065	11657	GO:0050896	12
211	GO:0060429	c(0.0507459932091271, 0.00672360421388737, 1, 0.136417771135271)	c(FALSE, TRUE, FALSE, FALSE)	300	c(2848, 1439, 3091, 2618)	c(91, 58, 86, 84)	GO:BP	epithelium development	15065	17246	GO:0009888	2
212	GO:0060560	c(1, 0.00677398343906844, 1, 1)	c(FALSE, TRUE, FALSE, FALSE)	78	c(2848, 1439, 3091, 2618)	c(23, 24, 20, 25)	GO:BP	developmental growth involved in morphogenesis	15065	17373	c("GO:0009653", "GO:0048589")	2
213	GO:0007507	c(0.203406332461203, 0.00695173342223009, 1, 1)	c(FALSE, TRUE, FALSE, FALSE)	202	c(2848, 1439, 3091, 2618)	c(65, 44, 60, 58)	GO:BP	heart development	15065	3387	c("GO:0048513", "GO:0072359")	2
214	GO:0150063	c(0.0401162576681459, 0.0351273017563384, 0.00805222005110754, 0.0904323511074768)	c(TRUE, TRUE, TRUE, FALSE)	159	c(2848, 1439, 3091, 2618)	c(56, 36, 61, 52)	GO:BP	visual system development	15065	23238	GO:0048880	2
215	GO:0001654	c(0.0401162576681459, 0.0351273017563384, 0.00805222005110754, 0.0904323511074768)	c(TRUE, TRUE, TRUE, FALSE)	159	c(2848, 1439, 3091, 2618)	c(56, 36, 61, 52)	GO:BP	eye development	15065	487	c("GO:0007423", "GO:0150063")	2
216	GO:0061061	c(0.00870327402390028, 0.0587233461076237, 1, 1)	c(TRUE, FALSE, FALSE, FALSE)	149	c(2848, 1439, 3091, 2618)	c(55, 34, 43, 40)	GO:BP	muscle structure development	15065	17854	GO:0048856	2
217	GO:0000278	c(1, 1, 0.00984199754366849, 0.10922123931256)	c(FALSE, FALSE, TRUE, FALSE)	254	c(2848, 1439, 3091, 2618)	c(74, 30, 87, 74)	GO:BP	mitotic cell cycle	15065	118	GO:0007049	4
218	GO:0006475	c(0.930334967259637, 1, 0.982934872464243, 0.0112174107129141)	c(FALSE, FALSE, FALSE, TRUE)	48	c(2848, 1439, 3091, 2618)	c(22, 10, 23, 24)	GO:BP	internal protein amino acid acetylation	15065	2465	GO:0006473	1
219	GO:0018393	c(0.930334967259637, 1, 0.982934872464243, 0.0112174107129141)	c(FALSE, FALSE, FALSE, TRUE)	48	c(2848, 1439, 3091, 2618)	c(22, 10, 23, 24)	GO:BP	internal peptidyl-lysine acetylation	15065	6265	c("GO:0006475", "GO:0018394")	1
220	GO:0018394	c(0.930334967259637, 1, 0.982934872464243, 0.0112174107129141)	c(FALSE, FALSE, FALSE, TRUE)	48	c(2848, 1439, 3091, 2618)	c(22, 10, 23, 24)	GO:BP	peptidyl-lysine acetylation	15065	6266	c("GO:0006473", "GO:0018205")	1
221	KEGG:04520	c(1, 0.011755066042428, 1, 0.164292659113526)	c(FALSE, TRUE, FALSE, FALSE)	45	c(2848, 1439, 3091, 2618)	c(14, 13, 15, 16)	KEGG	Adherens junction	15065	296	KEGG:00000
222	GO:0021915	c(0.0142950709584924, 1, 1, 0.127167170265303)	c(TRUE, FALSE, FALSE, FALSE)	34	c(2848, 1439, 3091, 2618)	c(20, 12, 17, 18)	GO:BP	neural tube development	15065	7474	c("GO:0007399", "GO:0035295", "GO:0043009", "GO:0060429")	2
223	GO:0006473	c(1, 1, 1, 0.0147487262820819)	c(FALSE, FALSE, FALSE, TRUE)	55	c(2848, 1439, 3091, 2618)	c(23, 10, 24, 26)	GO:BP	protein acetylation	15065	2463	GO:0043543	1
224	KEGG:04140	c(1, 0.125269754949924, 1, 0.0179459415737452)	c(FALSE, FALSE, FALSE, TRUE)	84	c(2848, 1439, 3091, 2618)	c(21, 17, 20, 28)	KEGG	Autophagy - animal	15065	258	KEGG:00000
225	GO:0051128	c(1, 0.0201526465157489, 1, 0.698922437862464)	c(FALSE, TRUE, FALSE, FALSE)	377	c(2848, 1439, 3091, 2618)	c(100, 67, 93, 98)	GO:BP	regulation of cellular component organization	15065	15644	c("GO:0016043", "GO:0050794")	3
226	GO:0016477	c(1, 0.0227892362324202, 1, 1)	c(FALSE, TRUE, FALSE, FALSE)	274	c(2848, 1439, 3091, 2618)	c(66, 53, 57, 61)	GO:BP	cell migration	15065	5837	GO:0048870	7
227	GO:0044770	c(0.192811707420968, 1, 0.0271397784062787, 0.0649520502168705)	c(FALSE, FALSE, TRUE, FALSE)	102	c(2848, 1439, 3091, 2618)	c(39, 12, 43, 38)	GO:BP	cell cycle phase transition	15065	13020	GO:0022402	4
228	GO:0040007	c(1, 0.0271439062537142, 1, 1)	c(FALSE, TRUE, FALSE, FALSE)	164	c(2848, 1439, 3091, 2618)	c(39, 37, 37, 41)	GO:BP	growth	15065	11490	GO:0008150	16
229	GO:0048562	c(0.353746503909353, 0.0271798531879794, 0.288125178198792, 0.195873137910601)	c(FALSE, TRUE, FALSE, FALSE)	138	c(2848, 1439, 3091, 2618)	c(48, 33, 51, 46)	GO:BP	embryonic organ morphogenesis	15065	14919	c("GO:0009887", "GO:0048568", "GO:0048598")	2
230	GO:0048863	c(0.195126200830018, 0.0272647383861355, 1, 1)	c(FALSE, TRUE, FALSE, FALSE)	113	c(2848, 1439, 3091, 2618)	c(42, 29, 42, 37)	GO:BP	stem cell differentiation	15065	15197	GO:0030154	2
231	GO:0016573	c(1, 1, 1, 0.0327861861966091)	c(FALSE, FALSE, FALSE, TRUE)	47	c(2848, 1439, 3091, 2618)	c(21, 10, 22, 23)	GO:BP	histone acetylation	15065	5870	c("GO:0016570", "GO:0018393")	1
232	GO:0010629	c(0.173207289639031, 1, 0.0330932908590203, 0.950393886131154)	c(FALSE, FALSE, TRUE, FALSE)	154	c(2848, 1439, 3091, 2618)	c(53, 28, 58, 48)	GO:BP	negative regulation of gene expression	15065	4787	c("GO:0010467", "GO:0010468", "GO:0010605")	1
233	GO:0060284	c(1, 0.0333774602971349, 1, 1)	c(FALSE, TRUE, FALSE, FALSE)	73	c(2848, 1439, 3091, 2618)	c(28, 22, 27, 26)	GO:BP	regulation of cell development	15065	17111	c("GO:0045595", "GO:0048468")	2
234	GO:0035239	c(0.167727540861088, 0.0334104908714083, 1, 1)	c(FALSE, TRUE, FALSE, FALSE)	213	c(2848, 1439, 3091, 2618)	c(68, 44, 63, 56)	GO:BP	tube morphogenesis	15065	10284	c("GO:0009653", "GO:0035295")	2
235	GO:1990138	c(1, 0.035334091155075, 1, 1)	c(FALSE, TRUE, FALSE, FALSE)	47	c(2848, 1439, 3091, 2618)	c(15, 17, 13, 16)	GO:BP	neuron projection extension	15065	28836	c("GO:0048588", "GO:0048812", "GO:0060560")	2
236	GO:0050684	c(0.420357011087214, 1, 0.0436681891503953, 0.706865578145587)	c(FALSE, FALSE, TRUE, FALSE)	31	c(2848, 1439, 3091, 2618)	c(17, 8, 19, 16)	GO:BP	regulation of mRNA processing	15065	15312	c("GO:0006397", "GO:1903311")	1
237	GO:0043038	c(1, 1, 0.0447972153156304, 1)	c(FALSE, FALSE, TRUE, FALSE)	39	c(2848, 1439, 3091, 2618)	c(18, 2, 22, 12)	GO:BP	amino acid activation	15065	12136	GO:0006520	1
238	GO:0043039	c(1, 1, 0.0447972153156304, 1)	c(FALSE, FALSE, TRUE, FALSE)	39	c(2848, 1439, 3091, 2618)	c(18, 2, 22, 12)	GO:BP	tRNA aminoacylation	15065	12137	c("GO:0006399", "GO:0043038")	1
239	GO:0006418	c(1, 1, 0.0447972153156304, 1)	c(FALSE, FALSE, TRUE, FALSE)	39	c(2848, 1439, 3091, 2618)	c(18, 2, 22, 12)	GO:BP	tRNA aminoacylation for protein translation	15065	2420	c("GO:0006412", "GO:0043039")	1
240	GO:0009451	c(1, 1, 0.0461072984281378, 1)	c(FALSE, FALSE, TRUE, FALSE)	107	c(2848, 1439, 3091, 2618)	c(28, 5, 44, 18)	GO:BP	RNA modification	15065	3953	c("GO:0016070", "GO:0043412")	1
241	KEGG:03050	c(0.300086576773996, 1, 0.0484460451241786, 1)	c(FALSE, FALSE, TRUE, FALSE)	26	c(2848, 1439, 3091, 2618)	c(11, 4, 13, 9)	KEGG	Proteasome	15065	214	KEGG:00000
242	KEGG:00071	c(0.0830206645841705, 1, 0.0484460451241786, 1)	c(FALSE, FALSE, TRUE, FALSE)	26	c(2848, 1439, 3091, 2618)	c(12, 4, 13, 5)	KEGG	Fatty acid degradation	15065	11	KEGG:00000
243	GO:0001501	c(1, 0.075850802459744, 1, 0.0487119000252449)	c(FALSE, FALSE, FALSE, TRUE)	144	c(2848, 1439, 3091, 2618)	c(45, 33, 47, 49)	GO:BP	skeletal system development	15065	431	GO:0048731	2
244	GO:0014031	c(1, 0.0497964531501022, 1, 1)	c(FALSE, TRUE, FALSE, FALSE)	69	c(2848, 1439, 3091, 2618)	c(26, 21, 25, 24)	GO:BP	mesenchymal cell development	15065	5161	c("GO:0048468", "GO:0048762")	2
245	GO:0048864	c(1, 0.0497964531501022, 1, 1)	c(FALSE, TRUE, FALSE, FALSE)	69	c(2848, 1439, 3091, 2618)	c(26, 21, 25, 24)	GO:BP	stem cell development	15065	15198	c("GO:0048468", "GO:0048863")	2
246	GO:0014032	c(1, 0.0497964531501022, 1, 1)	c(FALSE, TRUE, FALSE, FALSE)	69	c(2848, 1439, 3091, 2618)	c(26, 21, 25, 24)	GO:BP	neural crest cell development	15065	5162	c("GO:0014031", "GO:0014033", "GO:0048864")	2
