# Supplementary material for: Transcriptome and Proteome Analyses Reveal Stage-Specific DNA Damage Response in Embryos of Sturgeon (Acipenser ruthenus)
Source: Int J Mol Sci. 2022 Jun 7;23(12):6392. doi: 10.3390/ijms23126392 (PMC9223696; doi:10.3390/ijms23126392)
Supplement: Supplementary file 1 [file ijms-23-06392-s001.zip › Supplementary Table S2.xlsx]

## Sheet: CPT
Supplementary Table 2. Sterlet embryo proteins identified by MALDI-TOF-MS/MS. Sterlet embryos were treated with CPT at 24-48 and 48-72 hpf. Proteins were extracted at 7 dpf and separated with 2D-PAGE. Differences in spot intesities are shown as fold-change for each treatment compared to control. Functional categories were identified from Gene Ontology and KEGG database.
			Calculated		Observed										CPT 24-48	CPT 48-72
Spo No	Protein name (organism)	Accession No	MW (kDa)	pI	MW (kDa)	pI	MASCOT score	Sequence coverage (%)	Number of peptides (ion score ≥30)	Functional category, KEGG	Functional category, GO terms	Associated gene name	Change compared to control		fold change
1	keratin, type II cytoskeletal 8-like isoform X2 [Acipenser ruthenus]	gi|1849999341|ref|XP_034769964.1|	58.5	5.7	62	6	182	17	2	Cytoskeleton proteins; Intermediate filaments; Exosome	Keratin filament	LOC117967008	downregulated		0.531374	0.585226
2	protein disulfide-isomerase A3-like [Acipenser ruthenus]	gi|1849969939|ref|XP_033905542.2|	55.6	5.64	58	5.9	113	4	2	Protein processing in endoplasmic reticulum; Herpes simplex virus 1 infection	Protein disulfide isomerase activity	LOC117429811	downregulated		0.319956	0.813363
3	putative aminopeptidase W07G4.4 [Acipenser ruthenus]	gi|1849994618|ref|XP_034768350.1|	56.4	6.65	60	7.6	325	25	3	Glutathione metabolism; Metabolic pathways	Proteolysis / metalloaminopeptidase activity	LOC117966440	downregulated		0.269075	0.701416
4	keratin type IIs [Acipenser baerii]	gi|32452103|emb|CAD38125.1|	51.3	5.73	51	7.5	125	23	1	ND	Keratin filament	krt1	downregulated		0.240191	0.918153
5	tubulin beta chain-like isoform X3 [Acipenser ruthenus]	gi|1849998343|ref|XP_034769597.1|	45.1	4.93	48	5	415	22	4	ND	GTPase activity / microtubule-based process	LOC117394755	downregulated		0.676667	0.797466
6	alpha-enolase isoform X2 [Acipenser ruthenus]	gi|1849960711|ref|XP_034760970.1|	47.7	5.89	47	6	240	14	2	Glycolysis / Gluconeogenesis; Metabolic pathways; Carbon metabolism; Biosynthesis of amino acids; RNA degradation; HIF-1 signaling pathway	Catalytic activity / metal inon binding / cellular component organization	LOC117432244	downregulated		0.704621	0.906392
7	creatine kinase M-type [Acipenser ruthenus]	gi|1836646593|ref|XP_033883068.1|	43.2	6.32	45	6.9	253	14	2	Arginine and proline metabolism; Metabolic pathways	Creatine metabolic process / ATP binding	ckm, LOC117416112	downregulated		0.52367	0.472138
8	keratin, type I cytoskeletal 18 [Acipenser ruthenus]	gi|1849999355|ref|XP_033857134.2|	48.4	5.09	41	5	372	51	3	Cytoskeleton proteins; Intermediate filaments; Exosome	Structural molecule activity / intermediate filament	krt18, LOC117400895	downregulated		0.603316	0.581321
9	actin, cytoplasmic type 5 [Acipenser ruthenus]	gi|1836546369|ref|XP_033896901.1|	42.2	5.3	40	5.3	158	34	2	Phagosome; Apoptosis; Focal adhesion; Adherens junction; Tight junction; Regulation of actin cytoskeleton; Salmonella infection	Cell motility	LOC117424565	downregulated		0.608272	0.701068
10	profilin-1-like [Acipenser ruthenus]	gi|1850006668|ref|XP_034771266.1|	15.3	7.63	15	8	119	63	1	Regulation of actin cytoskeleton; Salmonella infection	Actin cytoskeletal organization / actin binding	pfn1, LOC117967916	downregulated		0.632925	0.895966
11	beta-enolase [Acipenser ruthenus]	gi|1849911228|ref|XP_034775690.1|	47.5	6.77	50	7	639	35	5	Glycolysis / Gluconeogenesis; Metabolic pathways; Carbon metabolism; Biosynthesis of amino acids; RNA degradation	Glycolytic process	eno3, LOC117971641	upregulated		1.71408	1.69134
12	vitellogenin-like [Acipenser ruthenus]	gi|1849918548|ref|XP_033858533.2|	195.2	9.16	200	4.5	280	21	2	ND	Lipid transporter activity	LOC117401786	upregulated		1.86255	1.68008
13	vitellogenin-like [Acipenser ruthenus]	gi|1849918548|ref|XP_033858533.2|	195.2	9.16	200	4.7	413	18	4	ND	Lipid transporter activity	LOC117401786	upregulated		1.77371	1.69546
14	vitellogenin-like [Acipenser ruthenus]	gi|1849918548|ref|XP_033858533.2|	195.2	9.16	200	4.8	551	23	5	ND	Lipid transporter activity	LOC117401786	upregulated		2.13733	0.932628
15	pyruvate dehydrogenase E1 component subunit alpha, mitochondrial-like isoform X2 [Acipenser ruthenus]	gi|1849908698|ref|XP_034774841.1|	44.8	7.92	45	7	511	41	7	Glycolysis / Gluconeogenesis; Citrate cycle (TCA cycle); Pyruvate metabolism; Metabolic pathways; Carbon metabolism	Oxidoreductase activity	pdha1a, LOC117405269	upregulated		2.99503	1.77694
16	zona pellucida sperm-binding protein 3-like [Acipenser ruthenus]	gi|1849904778|ref|XP_034773453.1|	42.8	6.42	40	5	653	27	4	Membrane trafficking; Exocytosis	Egg coat formation	LOC117962844	upregulated		2.31067	1.37575
17	zona pellucida sperm-binding protein 3-like [Acipenser ruthenus]	gi|1849904778|ref|XP_034773453.1|	42.8	6.42	40	5.2	584	37	5	Membrane trafficking; Exocytosis	Egg coat formation	LOC117962844	upregulated		2.65885	1.50895
18	zona pellucida sperm-binding protein 3-like [Acipenser ruthenus]	gi|1849904778|ref|XP_034773453.1|	42.8	6.42	40	5.5	654	32	5	Membrane trafficking; Exocytosis	Egg coat formation	LOC117962844	upregulated		2.64325	2.03673
19	zona pellucida sperm-binding protein 3-like [Acipenser ruthenus]	gi|1849926620|ref|XP_034781308.1|	44.6	7.9	40	7	299	29	3	Membrane trafficking; Exocytosis	Egg coat formation	LOC117427051	upregulated		2.18923	1.16143
20	Ubiquitin carboxyl-terminal hydrolase isozyme L1 [Acipenser ruthenus]	gi|1563847624|gb|RXM35207.1|	23.5	4.88	35	5	438	58	4	Ubiquitin system; Peptidases and inhibitors	Ubiquitin-dependent protein catabolic process	ND	upregulated		1.85232	1.16385
21	cofilin-2-like [Acipenser ruthenus]	gi|1836590517|ref|XP_033853471.1|	18.8	5.58	25	6.1	371	40	4	Regulation of actin cytoskeleton	Actin binding / actin filament depolymerization	cof2, LOC117398600	upregulated		1.56705	1.27357
22	fatty acid-binding protein, brain [Acipenser ruthenus]	gi|1836602138|ref|XP_033859546.1|	14.9	5.2	15	6	329	54	4	PPAR signaling pathway	Nervous system development / epithelial cell proliferation	LOC117402474	upregulated		1.71345	1.37557
23	myosin light chain 3, skeletal muscle isoform-like isoform X1 [Acipenser ruthenus]	gi|1849927377|ref|XP_033901491.2|	20.8	4.64	30	4.9	311	49	3	Cytoskeleton proteins	Calcium ion binding / structural constituent of muscle	myl3, LOC117427173	downregulated		0.450043	0.957885
24	translationally-controlled tumor protein homolog [Acipenser ruthenus]	gi|1836616861|ref|XP_033867470.1|	19.2	4.6	30	4.6	110	39	1	ND	Calcium ion binding	tpt1, LOC117407040	downregulated		0.463147	1.02541
25	myosin regulatory light chain 2, skeletal muscle isoform type 2-like [Acipenser ruthenus]	gi|1850000854|ref|XP_034770444.1|	21.3	4.89	17	5.2	108	21	1	Regulation of actin cytoskeleton; Focal adhesion; Salmonella infection	Calcium ion binding	myl2, LOC117398970	downregulated		0.393027	0.548715
