# Supplementary material for: Transcriptome and Proteome Analyses Reveal Stage-Specific DNA Damage Response in Embryos of Sturgeon (Acipenser ruthenus)
Source: Int J Mol Sci. 2022 Jun 7;23(12):6392. doi: 10.3390/ijms23126392 (PMC9223696; doi:10.3390/ijms23126392)
Supplement: Supplementary file 1 [file ijms-23-06392-s001.zip › Supplementary Table S3.xlsx]

## Sheet: Ola
Supplementary Table 3. Sterlet embryo proteins identified by MALDI-TOF-MS/MS. Sterlet embryos were treated with Olaparib at 2-24 and 24-48 hpf. Proteins were extracted at 7 dpf and separated with 2D-PAGE. Differences in spot intesities are shown as fold-change for each treatment compared to control. Functional categories were identified from Gene Ontology and KEGG database
			Calculated		Observed										Ola 2-24	Ola 24-48
Spo No	Protein name (organism)	Accession No	MW (kDa)	pI	MW (kDa)	pI	MASCOT score	Sequence coverage (%)	Number of peptides (ion score ≥30)	Functional category, KEGG	Functional category, GO terms	Associated gene name	Change compared to control		fold change
5	tubulin beta chain-like isoform X3 [Acipenser ruthenus]	gi|1849998343|ref|XP_034769597.1|	45.1	4.93	48	5	415	22	4	ND	GTPase activity / microtubule-based process	LOC117394755	downregulated		0.566171	0.563342
6	alpha-enolase isoform X2 [Acipenser ruthenus]	gi|1849960711|ref|XP_034760970.1|	47.7	5.89	47	6	240	14	2	Glycolysis / Gluconeogenesis; Metabolic pathways; Carbon metabolism; Biosynthesis of amino acids; RNA degradation; HIF-1 signaling pathway	Catalytic activity / metal inon binding / cellular component organization	LOC117432244	downregulated		0.411064	0.949116
7	creatine kinase M-type [Acipenser ruthenus]	gi|1836646593|ref|XP_033883068.1|	43.2	6.32	45	6.9	253	14	2	Arginine and proline metabolism; Metabolic pathways	Creatine metabolic process / ATP binding	ckm	downregulated		0.585324	0.945286
26	protein disulfide-isomerase A3 [Acipenser ruthenus]	gi|1564218630|gb|RXM94812.1|	63	5.18	58	5.9	411	27	5	Protein processing in endoplasmic reticulum; Herpes simplex virus 1 infection	Protein folding / RNA binding	pdia3, LOC117963059	upregulated		2.81118	1.69645
27	putative aminopeptidase W07G4.4 [Acipenser ruthenus]	gi|1849988165|ref|XP_033852781.2	56.3	6.48	60	7.6	225	18	3	Glutathione metabolism; Metabolic pathways	Proteolysis / metalloaminopeptidase activity	LOC117397928	upregulated		3.49316	2.83586
28	keratin type IE [Acipenser baerii]	gi|32452097|emb|CAD38122.1|	46.7	5.07	48	5	540	41	5	Estrogen signaling pathway; Staphylococcus aureus infection	Structural molecule activity / intermediate filament	krt14	upregulated		1.51608	1.07854
29	keratin, type I cytoskeletal 18 [Acipenser ruthenus]	gi|1849998557|ref|XP_034769679.1|	48.5	5.09	48	5.1	513	40	4	Cytoskeleton proteins; Intermediate filaments; Exosome	Structural molecule activity / intermediate filament	krt18, LOC117966903	upregulated		1.85293	1.12431
30	beta-enolase [Acipenser ruthenus]	gi|1849911228|ref|XP_034775690.1|	47.5	6.77	47	6.9	398	31	3	Glycolysis / Gluconeogenesis; Metabolic pathways; Carbon metabolism; Biosynthesis of amino acids; RNA degradation	Glycolytic process	eno3, LOC117971641	upregulated		2.8219	1.41877
31	pyruvate dehydrogenase E1 component subunit alpha, mitochondrial-like isoform X2 [Acipenser ruthenus]	gi|1849908698|ref|XP_034774841.1|	44.7	7.92	45	7	136	24	1	Glycolysis / Gluconeogenesis; Citrate cycle (TCA cycle); Pyruvate metabolism; Metabolic pathways; Carbon metabolism	Oxidoreductase activity	LOC117971027	upregulated		2.55563	2.78488
32	zona pellucida sperm-binding protein 3 [Acipenser ruthenus]	gi|1563845718|gb|RXM34902.1|	52.8	7.04	40	5.2	357	10	3	Membrane trafficking; Exocytosis	Egg coat formation	zp3, LOC117963755	upregulated		1.65911	1.21839
33	vitellogenin-like [Acipenser ruthenus]	gi|1849918548|ref|XP_033858533.2|	195.3	9.16	37	8.2	393	7	3	ND	Lipid transporter activity	LOC117401786	upregulated		1.5409	1.08581
34	vitellogenin-like [Acipenser ruthenus]	gi|1849918548|ref|XP_033858533.2|	195.3	9.16	36	6.5	383	6	3	ND	Lipid transporter activity	LOC117401786	upregulated		2.36094	1.58408
35	superoxide dismutase [Mn], mitochondrial [Acipenser ruthenus]	gi|1850009640|ref|XP_033874538.2|	24.8	8.36	25	7.9	112	18	1	FoxO signaling pathway; Peroxisome	Removal of superoxide radicals / oxidoreductase activity	sod2	upregulated		1.8702	1.14753
36	peroxiredoxin-1 isoform X2 [Acipenser ruthenus]	gi|1849984811|ref|XP_033858718.2|	22.2	8.23	22	7	342	24	2	Peroxisome	Peroxidase activity / oxidoreductase activity	LOC117402025	upregulated		3.38526	ND
37	peroxiredoxin-1 [Acipenser ruthenus]	gi|1563843908|gb|RXM33354.1|	20.8	6.15	22	7.1	324	34	3	Peroxisome	Peroxidase activity / oxidoreductase activity	prdx1, LOC117410636	upregulated		4.23887	ND
